# Supplementary material for: Alarms about structural alerts
Source: Royal Society of Chemistry journal article supplement (doi:10.1039/c6gc01492e), 2016-01-01
Supplement: c6gc01492e1.xlsx [file c6gc01492e1.xlsx]

## Sheet: Data + predictions
Name	SMILES	LLNA	QSAR	QSAR Toolbox	ToxAlerts
(16-b)-21-(Acetyloxy)-17-hydroxy-16-methylpregna-1,4,9(11)-triene-3,20-dione	CC1CC2C3CCC4=CC(=O)C=CC4(C)C3=CCC2(C)C1(O)C(=O)COC(C)=O	0	0	1	1
(2-Bromo-5-propoxyphenyl)-(2-hydroxy-4-methoxyphenyl)methanone	CCCOc1ccc(Br)c(c1)C(=O)c1ccc(OC)cc1O	0	0	1	1
(2E)-2-[(2-Formyl- 4-hydroxyphenyl)- methylidene]-butanedioic acid	OC(=O)CC(=Cc1ccc(O)cc1C=O)C(O)=O	1		1	1
(2E)-2-Decenal	CCCCCCCC=CC=O	1	1		1
(2E)-2-Methyl-2-butenal	CC=C(C)C=O	0	1		1
(2E,4E)-2,4-Hexadienal	CC=CC=CC=O	1	1		1
(2-oxo-1-phenylpyrrolidin-3-yl)-Triphenylphosphanium	O=C1C(CCN1c1ccccc1)P(c1ccccc1)(c1ccccc1)c1ccccc1	0			1
(3-Endo)-8-methyl- 8-azabicyclo[3,2,1]- octan-3-ol	CN1C2CCC1CC(O)C2	1			0
(3R,3aS,6aR)-Hexahydrofuro[2,3-b]furan-3-yl 4-nitrophenyl carbonate	O=C(OC1COC2OCCC12)Oc1ccc(cc1)N(=O)=O	1		1	1
(4E)-4-(Ethoxymethylene)-2-phenyl-1,3-oxazol-5(4H)-one	CCOC=C1N=C(OC1=O)c1ccccc1	1	0		1
(4Z)-2-Methyl-6-methylene-4-octene	CCC(=C)C=CCC(C)C	0	1		0
(E)-Anethol	COc1ccc(C=CC)cc1	1	1		1
[4-(Ethoxymethyl)-2,6-dimethoxyphenyl]boronic acid	CCOCc1cc(OC)c(B(O)O)c(OC)c1	0			0
[4S-[1(E),4alpha,5alpha]]-1-[3-[2-[4-Methoxy-2-(phenylmethoxy)-benzoyl]-4-propoxyphenyl]-1-oxo-2-propenyl]-3,4-dimethyl-5-phenyl-2-imidazoli-dinone	CCCOc1ccc(C=CC(=O)N2C(C(C)N(C)C2=O)c2ccccc2)c(c1)C(=O)c1ccc(OC)cc1OCc1ccccc1	0	0	1	1
1 -Phenyloctane-1,3-dione	CCCCCC(=O)CC(=O)c1ccccc1	1	1		0
1-(2',3',4',5'-Tetramethylphenyl)-3-(4'-tetrabutylphenyl)- propane-1,3-dione	CCCCc1ccc(cc1)C(=O)CC(=O)c1cc(C)c(C)c(C)c1C	0		1	1
1-(2',3',4',5'-Tetramethylphenyl)butane-1,3-dione	CC(=O)CC(=O)c1cc(C)c(C)c(C)c1C	1	1		0
1-(2',5'-diethylphenyl)butane-1,3-dione	CCc1ccc(CC)c(c1)C(=O)CC(C)=O	1	1		0
1-(2,5-Dimethylphenyl)-1,3-butanedione	CC(=O)CC(=O)c1cc(C)ccc1C	1			0
1(2H)-Pyridazinamine	Nn1ccccn1	0		0	1
1-(3',4',5'-Tetramethoxy-phenyl)-4,4-dimethylpentane-1,3-dione	COc1cc(cc(OC)c1OC)C(=O)CC(=O)C(C)(C)C	0			0
1-(4-Ethoxyphenyl)-2-[4-(methylsulfonyl)phenyl]ethanone	CCOc1ccc(cc1)C(=O)Cc1ccc(cc1)S(C)(=O)=O	0	0	1	1
1-(p-methoxyphenyl)-1- penten-3-one	CCC(=O)C=Cc1ccc(OC)cc1	1	1		1
1-(Prop-2-enoyloxy)-2-[(prop-2-enoyloxy)methyl]pentan-3-yl prop-2-enoate	CCC(OC(=O)C=C)C(COC(=O)C=C)COC(=O)C=C	1	0	0	1
1-(tert-Butoxycarbonyl)-4-fluoro-L-prolinamide	CC(C)(C)OC(=O)N1CC(F)CC1C(N)=O	0	0	1	1
1-(tert-Butoxycarbonyl)-4-fluoro-L-proline	CC(C)(C)OC(=O)N1CC(F)CC1C(O)=O	0	0	0	1
1,1-Dimethylethyl[(1s)-2-[4-[(2-methyl-4-thiazolyl)methoxy]phenyl]-1-(2s)-oxiranylethyl]-carbamate	Cc1nc(COc2ccc(CC(NC(=O)OC(C)(C)C)C3CO3)cc2)cs1	0	0	1	1
1,1-Dimethylethyl[1-[bis(4-fluorophenyl)-methyl]-2-[2-cyano-4-fluoro-1-pyrrolidinyl]-2-oxoethyl]carbamate	CC(C)(C)OC(=O)NC(C(c1ccc(F)cc1)c1ccc(F)cc1)C(=O)N1CC(F)CC1C#N	0	0	1	1
1,1-Dimethylethyl3-[[[[(3s)-2,3,4,5-tetrahydro-1-[2-[(1-methylethyl)pheny lamino]-2-oxoethyl]-2,4-dioxo-5-phenyl-1h-1,5-benzodiazepin-3-yl]amino]carbonyl]amino]benzoate	CC(C)N(C(=O)CN1c2ccccc2N(c2ccccc2)C(=O)C(NC(=O)Nc2cccc(c2)C(=O)OC(C)(C)C)C1=O)c1ccccc1	1	0	1	1
1,2,3,5,6,7-Hexahydro-2-thioxo-4h-cyclopentapyrimi-din-4-one	O=C1NC(=S)NC2=C1CCC2	0	0		0
1,2-Benzisothiazolin-3-one	O=C1NSc2ccccc12	1			1
1,2-Diaminocyclohexane	NC1CCCCC1N	1	1		0
1,2-Dibromo-2,4-dicyanobutane	BrCC(Br)(CCC#N)C#N	1			1
1,3-benzenedimethanamine	NCC1=CC(CN)=CC=C1	1		1	1
1,3-Benzodioxazole-5- sulphonyl chloride	ClS(=O)(=O)c1ccc2OCOc2c1	1		0	1
1,3-bis(2,5-dimethylphenyl)propane-1,3-dione	Cc1ccc(C)c(c1)C(=O)CC(=O)c1cc(C)ccc1C	0			1
1,4-Dihydroquinone	Oc1ccc(O)cc1	1	1		1
1,5-Dimethyl-3-(1-oxo-2-propenyl)-4-phenyl-2-imidazolidinone	CC1C(N(C(=O)C=C)C(=O)N1C)c1ccccc1	1	0	1	1
1,5-Dimethyl-4-phenyl-2-imidazolidinone	CC1C(NC(=O)N1C)c1ccccc1	0		0	1
1,6-Bis(2,3-epoxypropoxy)-hexane	C(CCCOCC1CO1)CCOCC1CO1	1	1	1	1
1-[1-3-(1,3-Benzodioxol-5-yl)-(2-benzyloxy-4- methoxyphenyl)-1- hydroxy-6- propoxy-2-indanoyl]-3,4- dimethyl-5-phenyl-imidazolidinone	CCCOc1ccc2C(C(C(=O)N3C(C(C)N(C)C3=O)c3ccccc3)C(O)(c2c1)c1ccc(OC)cc1OCc1ccccc1)c1ccc2OCOc2c1	0	0	1	1
1-[2-Amino-3,3-bis(4-fluorophenyl)-1-oxopropyl]-4-fluoro-2-pyrrolidine carbonitrile	NC(C(c1ccc(F)cc1)c1ccc(F)cc1)C(=O)N1CC(F)CC1C#N	0	0		1
1-[3-(Cyclopentyloxy)-4-methoxy-phenyl]-4-oxocyclohexane carbonitrile	COc1ccc(cc1OC1CCCC1)C1(CCC(=O)CC1)C#N	0	0		1
1-[3,5-Bis(trifluoromethyl)phenyl]-N-methylethanamine	CNC(C)c1cc(cc(c1)C(F)(F)F)C(F)(F)F	0	0		0
1-[5-[(4-Fluorophenyl)methyl]-2-furanyl]ethanone	CC(=O)c1ccc(Cc2ccc(F)cc2)o1	0		1	1
12-Bromo-1-dodecanol	OCCCCCCCCCCCCBr	1	1		1
12-Bromododecanoic acid	OC(=O)CCCCCCCCCCCBr	1	1		1
14-Hydroxynor-morphinone	Oc1ccc2CC3NCCC45C(Oc1c24)C(=O)C=CC35O	1	0	1	1
1-Chloro-2,4- dinitrobenzene	Clc1ccc(cc1N(=O)=O)N(=O)=O	1			1
1-Chloromethyl- pyrene	ClCc1ccc2ccc3cccc4ccc1c2c34	1			1
1-Chlorooctadecane	CCCCCCCCCCCCCCCCCCCl	1	1		1
1-Iododecane	CCCCCCCCCCI	1	1	1	1
1-Methyl-3-nitro- nitrosoguanidine	CN(N=O)C(=N)NN(=O)=O	1			0
1-Naphthol	Oc1cccc2ccccc12	1			1
1-Phenyl-1,2-propanedione	CC(=O)C(=O)c1ccccc1	1			1
1-Phenyl-2-methylbutane-1,3-dione	CC(C(C)=O)C(=O)c1ccccc1	1	1		0
1-Phenylpropylamine	CCC(N)c1ccccc1	0	1		0
2-(2,4-Diaminophenoxy)ethanol	Nc1ccc(OCCO)c(N)c1	1		1	1
2-(3,4-Dimethylphenyl)-5-methyl-2,4-dihydro-3H-pyrazol-3-one	CC1=CC(=O)N(N1)c1ccc(C)c(C)c1	1			0
2-(4-Amino-2nitro-phenylamino)-ethanol	Nc1ccc(NCCO)c(c1)N(=O)=O	1	1		1
2-(4-Ethoxyphenyl)-3-[4-(methylsulfonyl)phenyl]pyrazolo[1,5-b]pyridazine	CCOc1ccc(cc1)-c1nn2ncccc2c1-c1ccc(cc1)S(C)(=O)=O	0	0		0
2-(4-Oxopentyl)-1H-isoindole-1,3(2H)-dione	CC(=O)CCCN1C(=O)c2ccccc2C1=O	0	0	1	1
2-(4-tert-Amylcyclohexyl)acetaldehyde	CCC(C)(C)C1CCC(CC=O)CC1	1	1		1
2-(Benzyl)tert- butyl)amino)-1-(alpha,4-dihydroxy-m-tolyl)ethane	CC(C)(C)N(CC(O)c1ccc(O)c(CO)c1)Cc1ccccc1	0	0		0
2(E)-Hexenal	CCCC=CC=O	1			1
2-(Hydroxymethyl)pentane-1,3-diol	CCC(O)C(CO)CO	1			0
2,2,6,6-Tetramethyl-heptane-3,5-dione	CC(C)(C)C(=O)CC(=O)C(C)(C)C	1			1
2,2-bis-[4-(2-hydroxy-3methacryloxypropoxy)phenyl)]-propane	CC(=C)C(=O)OCC(O)COc1ccc(cc1)C(C)(C)c1ccc(OCC(O)COC(=O)C(C)=C)cc1	1	0		1
2,3,3a,4,5,6a-Hexahydrofuro[5,4-b]furan-3-yl N-[3-(1,3-benzodioxol-5-ylsulfonyl-isobutyl-amino)-2-hydroxy-1-[[4-[(2-methylthiazol-4-yl)methoxy]phenyl]methyl]propyl]carbamate	CC(C)CN(CC(O)C(Cc1ccc(OCc2csc(C)n2)cc1)NC(=O)OC1COC2OCCC12)S(=O)(=O)c1ccc2OCOc2c1	0	0	1	1
2,3,4,5-Tetrahydro-N-(1-methylethyl)-2,4-dioxo-N,5-diphenyl-3-[(phenylmethoxy)-imino]-1H-1,5-benzodiazepine-1-acetamide	CC(C)N(C(=O)CN1c2ccccc2N(c2ccccc2)C(=O)C(=NOCc2ccccc2)C1=O)c1ccccc1	0	0	1	1
2,3-Dihydro-1,3-oxazol-2-one	O=C1NC=CO1	1			0
2,3-Dimethyl-2H-indazol-6-amine	Cc1n(C)nc2cc(N)ccc12	0		1	1
2,4,6-Trichloro- 1,3,5-triazine	Clc1nc(Cl)nc(Cl)n1	1			1
2,4-Dichloro-pyrimidine	Clc1ccnc(Cl)n1	1			0
2,4-Dinitrobenzene sulfonic acid	OS(=O)(=O)c1ccc(cc1N(=O)=O)N(=O)=O	1			0
2,4-Heptadienal	CCC=CC=CC=O	1	1		1
2,5-Diaminotoluene	Cc1cc(N)ccc1N	1	1		1
2,6,6-Trimethyl-1,3-cyclohexadiene-1-carbaldehyde	CC1=C(C=O)C(C)(C)CC=C1	1	1		1
2,6-Dimethoxy-4-methyl-5-[3-(trifluoromethyl)phenoxy]-8-quinolinamine	COc1cc(C)c2c(Oc3cccc(c3)C(F)(F)F)c(OC)cc(N)c2n1	0	0	1	1
2,6-Dimethoxy-4-methyl-8-nitro-5-[3-(trifluoromethyl)-phenoxy]quinoline	COc1cc(C)c2c(Oc3cccc(c3)C(F)(F)F)c(OC)cc(c2n1)N(=[O])=[O]	1	0	1	1
2-[(Benzyloxy)-imino]malonic acid	OC(=O)C(=NOCc1ccccc1)C(O)=O	0	0		0
2-[1-(4-Bromophenyl)-1-phenylethoxy]-N,N-dimethyl-ethanamine hydrochloride	CN(C)CCOC(C)(c1ccccc1)c1ccc(Br)cc1	1	0	1	1
2-[4-({2,6-Dimethoxy-4-methyl-5-[3-(trifluoromethyl)phenoxy]-8-quinolinyl}amino)pentyl]-1H-isoindole-1,3(2H)-dione	COc1cc(C)c2c(Oc3cccc(c3)C(F)(F)F)c(OC)cc(NC(C)CCCN3C(=O)c4ccccc4C3=O)c2n1	0	0	1	1
2-Acetylcyclohexanone	CC(=O)C1CCCCC1=O	0	1		0
2-Amino-6-chloro- 4-nitrophenol	Nc1cc(cc(Cl)c1O)N(=O)=O	1			1
2-Amino-di- phenylamine	Nc1ccccc1Nc1ccccc1	1	1	0	1
2-Aminoethyl methyl sulfone	CS(=O)(=O)CCN	0		1	1
2-Aminophenol	Nc1ccccc1O	1			1
2-Benzyl-tert-butylamino-3'-hydroxymethyl-4'-hydroxyaceto-phenone	CC(C)(C)N(CC(=O)c1ccc(O)c(CO)c1)Cc1ccccc1	1	0	1	1
2-Bromo-5-hydroxy-benzaldehyde	Oc1ccc(Br)c(C=O)c1	1		0	1
2-Bromo-5-propoxybenzoic acid	CCCOc1ccc(Br)c(c1)C(O)=O	0			0
2-Bromotetra-decanoic acid	CCCCCCCCCCCCC(Br)C(O)=O	1	1		1
2-Chloro-1-[(3- fluorophenyl)- methoxy]-4-nitrobenzene	Fc1cccc(COc2ccc(cc2Cl)N(=O)=O)c1	1		1	1
2-Chloro-6-methoxy-4-methylquinoline	COc1ccc2nc(Cl)cc(C)c2c1	0	0		0
2-Ethylhexyl acrylate	CCCCC(CC)COC(=O)C=C	1	1		1
2-Hydroxyethyl acrylate	OCCOC(=O)C=C	1	0		1
2-Hydroxypropyl methacrylate	CC(O)COC(=O)C(C)=C	0	1		1
2-Mercapto-benzothiazole	Sc1nc2ccccc2s1	1	0		0
2-Methoxy-4-methyl-4-(prop-2-en-1-yl)cyclohex-2-en-1-one	COC1=CC(C)(CC=C)CCC1=O	1	1	1	1
2-Methoxy-4-methylphenol	COc1cc(C)ccc1O	1	1		1
2-methoxy-5-propylphenol	CCCc1ccc(OC)c(O)c1	1	1		1
2-Methyl propenoic acid	CC(=C)C(O)=O	1			1
2-Methyl-4H-3,1-benzoxazin-4-one	CC1=Nc2ccccc2C(=O)O1	1	0		0
2-Methyl-5-hydroxy-ethylaminophenol	Cc1ccc(NCCO)cc1O	1		0	1
2-Methylundecanal	CCCCCCCCCC(C)C=O	1	1		1
2-Nitro-p- phenylenediamine	Nc1ccc(N)c(c1)N(=O)=O	1	1		1
3-(2,3-Dihydro-1H-inden-2-yl)-1-[1-(2-methyl-1,3-oxazol-4-yl)-2-(4-morpholinyl)-2-oxoethyl]-6-[1-methylpropyl]-2,5-piperazinedione	CCC(C)C1N(C(C(=O)N2CCOCC2)c2coc(C)n2)C(=O)C(NC1=O)C1Cc2ccccc2C1	0	0	1	1
3, 3', 4', 5-Tetrachloro-salicylanilide	Oc1c(Cl)cc(Cl)cc1C(=O)Nc1ccc(Cl)c(Cl)c1	1	0		1
3,4-Dichloroaniline hydrochloride	Nc1ccc(Cl)c(Cl)c1	1	0	0	1
3,4-Dihydrocoumarin	O=C1CCc2ccccc2O1	1			1
3,5,5-Trimethyl- hexanoyl chloride	CC(CC(Cl)=O)CC(C)(C)C	1	1		1
3-[(2R)-3-[[2-(2,3-Dihydro-1H-inden-2-yl)-1,1-dimethyl-ethyl]amino]-2-hydroxypropoxy]-4,5-difluoro-benzene propanoic acid	CC(C)(CC1Cc2ccccc2C1)NCC(O)COc1cc(CCC(O)=O)cc(F)c1F	0	0		0
3-{4-[(6-Bromohexyl)oxy]butyl}benzenesulfonamide	NS(=O)(=O)c1cccc(CCCCOCCCCCCBr)c1	0		1	1
3-Amino-2,3,4,5-tetrahydro-N-(1-methylethyl)-2,4-dioxo-N,5-diphenyl-1H-1,5-benzodiazepine-1-acetamide	CC(C)N(C(=O)CN1c2ccccc2N(c2ccccc2)C(=O)C(N)C1=O)c1ccccc1	0	0	1	1
3-Aminomethyl- 3,5,5-trimethylcyclohexyl amine	CC1(C)CC(N)CC(C)(CN)C1	1	1		1
3-Aminophenol	Nc1cccc(O)c1	1	1		1
3-Bromomethyl-5, 5'-dimethyl- dihydro-2(3H)-furanone	CC1(C)CC(CBr)C(=O)O1	1			1
3-Chloro-4-fluorobenzoylchloride	Fc1ccc(cc1Cl)C(Cl)=O	1		1	1
3-Dimethylamino- propylamine	CN(C)CCCN	1			1
3-Ethoxy-1-(2',3',4',5'-tetramethylphenyl)propane-1,3-dione	CCOC(=O)CC(=O)c1cc(C)c(C)c(C)c1C	1	0		1
3-Fluoro-5-(3-pyridinyl)benzen-amine	Nc1cc(F)cc(c1)-c1cccnc1	1		1	1
3-Hydroxy-2,4,7,14-tetramethyl-9-oxo-4-vinyltricyclo[5.4.3.01,8]tetradec-6-yl [(8-methyl-8-azabicyclo[3.2.1]oct-3-yl)sulfanyl]acetate	CC1CCC23CCC(=O)C2C1(C)C(CC(C)(C=C)C(O)C3C)OC(=O)CSC1CC2CCC(C1)N2C	0	0	0	1
3-Hydroxy-2-phenyl-4-quinolinecarboxylic acid	OC(=O)c1c(O)c(nc2ccccc12)-c1ccccc1	0	0		0
3-Hydroxy-4-methoxybenzaldehyde	COc1ccc(C=O)cc1O	0	0	0	1
3-Isopropyl-6-methylcyclohexene	CC(C)C1CCC(C)C=C1	0			0
3-Methyl-4-phenyl-1,2,5-thiadiazole-1,1-dioxide	C=C1NS(=O)(=O)N=C1c1ccccc1	1			0
3-Methyleugenol	COc1c(C)cc(CC=C)cc1O	1	1		1
3-Methylisoeugenol	COc1c(C)c(C=CC)ccc1O	1	1		1
3-Phenylene-diamine	Nc1cccc(N)c1	1	1		1
3-Propoxybenzoic acid	CCCOc1cccc(c1)C(O)=O	0	0		0
3-Propylidene phthalide	CCC=C1OC(=O)c2ccccc12	1			1
4-(Bromomethyl)- benzoic acid ethyl ester	CCOC(=O)c1ccc(CBr)cc1	1		1	1
4-(N-Ethyl-N-2- methan-sulfamido- ethyl)-2-methyl- 1,4,-phenylene-diamine	CCN(CCNS(C)(=O)=O)c1ccc(N)c(C)c1	1		0	1
4(or3)-(4-hydroxy-4-methylphenyl)-3-cyclohexen-1-carboxyaldehyde	CC(C)(O)CCCC1=CCC(CC1)C=O	1	1		1
4'-(Trifluoromethyl)-[1,1'- biphenyl]-4-carboxaldehyde	FC(F)(F)c1ccc(cc1)-c1ccc(C=O)cc1	0		1	1
4,4,4-Trifluoro-1- phenylbutane-1,3- dione	FC(F)(F)C(=O)CC(=O)c1ccccc1	1			0
4,4-Dibromobenzil	BrC1(Br)CC=C(C=C1)C(=O)C(=O)c1ccccc1	1		1	1
4-[4-({1-Butyl-3-[cyclohexyl(hydroxy)methyl]-2,5-dioxo-1,4,9-triazaspiro[5.5]undec-9-yl}methyl)phenoxy]benzoic acid	CCCCN1C(=O)C(NC(=O)C11CCN(Cc2ccc(Oc3ccc(cc3)C(O)=O)cc2)CC1)C(O)C1CCCCC1	0	0	1	1
4-Allylanisole	COc1ccc(CC=C)cc1	1	1		1
4-Amino-3- nitrophenyl thiocyanate	Nc1ccc(SC#N)cc1N(=O)=O	1		0	1
4-Bromo-1- phthalimidopentane	CC(Br)CCCN1C(=O)c2ccccc2C1=O	1	0	1	1
4-Chloro-6- iodoquinazoline	Clc1ncnc2ccc(I)cc12	1			0
4-Cyano-4-[3-(cyclopentyloxy)-4-methoxyphenyl]cyclohexanecarboxylic acid	COc1ccc(cc1OC1CCCC1)C1(CCC(CC1)C(O)=O)C#N	0	0	1	1
4-Fluoro-2-Pyrrolidine-Carboxamide	NC(=O)C1CC(F)CN1	0			0
4-Hydroxybenzoic acid	OC(=O)c1ccc(O)cc1	0	0		0
4-Iodo-1-phthalimido-pentane	CC(I)CCCN1C(=O)c2ccccc2C1=O	1		1	1
4-Isopropenyl-1-methyl-2-methylene-cyclohexane	CC1CCC(CC1=C)C(C)=C	0	0		0
4-isopropenyl-1-methyl-6-methylene-cyclohexene	CC(=C)C1CC=C(C)C(=C)C1	1			0
4-Isopropyl-1-methylene-cyclohexane	CC(C)C1CCC(=C)CC1	0	0		0
4'-Methoxyacetophenone	COc1ccc(cc1)C(C)=O	0			1
4-Methylamino- phenol sulfate	CNc1ccc(O)cc1	1	1		1
4-Nitrobenzyl bromide	BrCc1ccc(cc1)N(=O)=O	1			1
4-Phenylene-diamine	Nc1ccc(N)cc1	1			1
4-Sulfophenyl-6-((1-oxononyl)amino)hexanoate (Nonanoylamidocaproylacidoxybenzenesulfonate)	CCCCCCCCC(=O)NCCC(CCC(O)=O)c1ccccc1S(O)(=O)=O	1			0
5-({4-[(2,3-Dimethyl-2H-indazol-6-yl)(methyl)amino]-2-pyrimidinyl}amino)-2-methylbenzenesulfonamide	CN(c1ccc2c(C)n(C)nc2c1)c1ccnc(Nc2ccc(C)c(c2)S(N)(=O)=O)n1	0	0	1	1
5-(prop-1-en-1-yl)-2-(propan-2-yloxy)phenol	COc1cc(C=CC)ccc1OC(C)C	1		1	1
5,5-Dimethyl-3-methylenedihydro-2(3H)-furanone	CC1(C)CC(=C)C(=O)O1	1	1		1
5-Amino-2-methylbenzene-sulfonamide	Cc1ccc(N)cc1S(N)(=O)=O	0	0	1	1
5-Amino-O-Cresol	Cc1ccc(N)cc1O	1			1
5'-Chloro-2'- hydroxy-3'-nitro- [1,1'-biphenyl]-3- carboxylic acid	OC(=O)c1cccc(c1)-c1cc(Cl)cc(c1O)N(=O)=O	1	0		0
5-Chloro-2,6- dimethoxy-4- methyl-8- nitroquinoline	COc1cc(C)c2c(Cl)c(OC)cc(c2n1)N(=O)=O	1	0		0
5-Chloro-2,6-dimethoxy-4-methylquinoline	COc1cc(C)c2c(Cl)c(OC)ccc2n1	0	0		0
5-Chloro-2-methyl- 4-isothiazolin-3-one	CN1SC(Cl)=CC1=O	1			0
5-Chloro-6-methoxy-4-methyl-8-nitro-2(1h)quinolinone	COc1cc(c2NC(=O)C=C(C)c2c1Cl)N(=O)=O	1			0
5-Methoxy-2-nitro-4-(trifluoromethyl) benzene acetonitrile	COc1cc(CC#N)c(cc1C(F)(F)F)N(=[O])=[O]	0	0		0
5-Methoxy-6-trifluoromethyl-2,3-dihydro-1H-indole	COc1cc2CCNc2cc1C(F)(F)F	1	0		1
5-Methyl-2,3-hexanedione	CC(C)CC(=O)C(C)=O	1			1
5-Methyl-2-phenyl-2-hexenal	CC(C)CC=C(C=O)c1ccccc1	1	1		1
5-Methyl-6-(trifluoromethyl)indoline	Cc1cc2CCNc2cc1C(F)(F)F	0		1	1
5-Methyleugenol	COc1cc(CC=C)c(C)cc1O	1	1		1
6-(Diethylamino)- 1 -hexanol	CCN(CC)CCCCCCO	1	1		0
6(E)-Nonenal	CCC=CCCCCC=O	1	1		1
6-[(2-Methyl-3-pyridinyl)oxy]-3-pyridinamine	Cc1ncccc1Oc1ccc(N)cn1	1		1	1
6-Chloro-1-hexanol	OCCCCCCCl	0		1	1
6-Diethylaminohexyl bromide hydrobromide	CCN(CC)CCCCCCBr	1	1	1	1
6-Ethenyldeca-hydro-5-hydroxy-4,6,9,10-tetramethyl-1-oxo-3a,9-propano-3ah-cyclopentacyclo-octen-8-yl [[(3-exo)-8-methyl-8-azabicyclo-[3.2.1]oct-3-yl]thio]-acetate	CC1CCC23CCC(=O)C2C1(C)C(CC(C)(C=C)C(O)C3C)OC(=O)CO	0	0	1	1
6-Iodo-quinazolin-4-ol	Ic1ccc2N=CNC(=O)c2c1	0			0
6-Methoxy-4-methyl-2(1H)-quinolinone	COc1ccc2NC(=O)C=C(C)c2c1	0			0
6-Methoxy-4-methyl-8-quinolinamine	COc1cc(N)c2nccc(C)c2c1	0	0		1
6-Methylcoumarin	Cc1ccc2OC(=O)C=Cc2c1	0	0		0
6-Methyleugenol	COc1cc(CC=C)cc(C)c1O	1	1		1
6-Methylisoeugenol	COc1cc(C=CC)cc(C)c1O	1	1		1
7,12-Dimethyl-benz[a]anthracene	Cc1c2ccccc2c(C)c2c1ccc1ccccc21	1			1
7-[(4z)-3-(Aminomethyl)-4-(methoxyimino)-1 -pyrrolidinyl]-1-cyclopropyl-6-fluoro-1,4-dihydro-4-oxo-1,8-naphthyridine-3 -carboxylic acid,monomethane-sulfonate	CON=C1CN(CC1CN)c1nc2N(C=C(C(O)=O)C(=O)c2cc1F)C1CC1	1	0		0
7-Bromotetradecane	CCCCCCCC(Br)CCCCCC	1	1		1
8-Chloro-3-pentyl-3,7-dihydro-1h-purine-2,6-dione	CCCCCN1c2nc(Cl)[nH]c2C(=O)NC1=O	1	0		0
8-Hydroxy-5-{1-hydroxy-2-[(2-{4-[(4-methoxy-3-phenylphenyl)amino]phenyl}ethyl)amino]ethyl}-1,2-dihydroquinolin-2-one	COc1ccc(Nc2ccc(CCNCC(O)c3ccc(O)c4NC(=O)C=Cc34)cc2)cc1-c1ccccc1	0	0		0
a-Amyl cinnamic aldehyde	CCCCCC(C=O)=Cc1ccccc1	1	1		1
Abietic acid	CC(C)C1=CC2=CCC3C(C)(CCCC3(C)C(O)=O)C2CC1	1			0
a-Butyl cinnamic aldehyde	CCCCC(C=O)=Cc1ccccc1	1	1		1
Adipic acid	OC(=O)CCCCC(O)=O	0	0		0
a-Hexyl cinnamic aldehyde	CCCCCCC(C=O)=Cc1ccccc1	1	1		1
alpha-Methyl cinnamic aldehyde	CC(C=O)=Cc1ccccc1	1	1		1
a-Methyl phenylacetaldehyde	CC(C=O)c1ccccc1	1	1		1
Aniline	Nc1ccccc1	1			1
Anthranilic acid	Nc1ccccc1C(O)=O	0		0	1
a-Phellandrenea	CC(C)C1CC=C(C)C=C1	1	1		0
a-Terpinene	CC(C)C1=CC=C(C)CC1	1			0
Atrazine	CCNc1nc(Cl)nc(NC(C)C)n1	0		0	1
Azithromycin	CCC1OC(=O)C(C)C(OC2CC(C)(OC)C(O)C(C)O2)C(C)C(OC2OC(C)CC(C2O)N(C)C)C(C)(O)CC(C)CN(C)C(C)C(O)C1(C)O	1	0	1	1
Bandrowski's base	Nc1ccc(cc1)N=C1CC(=N)C(CC1=N)=Nc1ccc(N)cc1	1	0		1
Benzaldehyde	O=Cc1ccccc1	0	1		1
Benzalkonium chloride	CCCCCCCCCCCCCC[N+](C)(C)Cc1ccccc1	1	1	1	1
Benzene-1,3,4-tricarboxylic anhydride	OC(=O)c1ccc2C(=O)OC(=O)c2c1	1	0		1
Benzo[a]pyrene	c1ccc2c(c1)cc1ccc3cccc4ccc2c1c34	1			1
Benzocaine	CCOC(=O)c1ccc(N)cc1	0	0		1
Benzoquinone	O=C1C=CC(=O)C=C1	1	1		1
Benzyl benzoate	O=C(OCc1ccccc1)c1ccccc1	1	1		1
Benzyl Bromide	BrCc1ccccc1	1	0		1
Benzylidene acetone	CC(=O)C=Cc1ccccc1	1	1		1
beta-Propiolactone	O=C1CCO1	1			1
b-Phellandrene	CC(C)C1CCC(=C)C=C1	1	0		0
b-Phenylcinnamaldehyde	O=CC=C(c1ccccc1)c1ccccc1	1	1		1
Bromobutane	CCCCBr	0	1		1
Bromodocosane	CCCCCCCCCCCCCCCCCCCCCCBr	1	1		1
Bromododecane	CCCCCCCCCCCCBr	1	1		1
Bromoeicosane	CCCCCCCCCCCCCCCCCCCCBr	1	1		1
Bromoheptadecane	CCCCCCCCCCCCCCCCCBr	1	1		1
Bromohexadecane	CCCCCCCCCCCCCCCCBr	1	1		1
Bromohexane	CCCCCCBr	1	0		1
Bromononane	CCCCCCCCCBr	0	1		1
Bromooctadecane	CCCCCCCCCCCCCCCCCCBr	1	1		1
Bromopentadecane	CCCCCCCCCCCCCCCBr	1	1		1
Bromotetradecane	CCCCCCCCCCCCCCBr	1	1		1
Bromotridecane	CCCCCCCCCCCCCBr	1	1		1
Bromoundecane	CCCCCCCCCCCBr	1	1		1
b-Terpinene	CC(C)C1=CCC(=C)CC1	0			0
Butanedione	CC(=O)C(C)=O	1			1
Butanol	CCCCO	0			0
Butyl acrylate	CCCCOC(=O)C=C	1	1		1
Butyl glycidyl ether	CCCCOCC1CO1	1			1
C11-azlactone	CCCCCCCCCCCC1=NC(C)(C)C(=O)O1	1	1		1
C15-azlactone	CCCCCCCCCCCCCCCC1=NC(C)(C)C(=O)O1	1	1		1
C17-azlactone	CCCCCCCCCCCCCCCCCC1=NC(C)(C)C(=O)O1	1	1		1
C4-azlactone	CCCCC1=NC(C)(C)C(=O)O1	1	1		1
C6-azlactone	CCCCCCC1=NC(C)(C)C(=O)O1	1	1		1
C9-azlactone	CCCCCCCCCC1=NC(C)(C)C(=O)O1	1	1		1
Carvoxime	CC(=C)C1CCC(C)=C(C1)N=O	1	1	1	1
Chlorobenzene	Clc1ccccc1	0			0
Chlorononane	CCCCCCCCCCl	0	1		1
Chlorotetradecane	CCCCCCCCCCCCCCCl	1	1		1
Chlorothalonil	Clc1c(Cl)c(C#N)c(Cl)c(C#N)c1Cl	1			0
Cinnamic alcohol	OCC=Cc1ccccc1	1	1		1
Cinnamic aldehyde	O=CC=Cc1ccccc1	1	1		1
Citral	CC(C)=CCCC(C)=CC=O	1	1		1
Clarithromycin	CCC1OC(=O)C(C)C(OC2CC(C)(OC)C(O)C(C)O2)C(C)C(OC2OC(C)CC(C2O)N(C)C)C(C)(CC(C)C(=O)C(C)C(O)C1(C)O)OC	0	0	1	1
Clorohexadecane	CCCCCCCCCCCCCCCCCl	1	1		1
Clotrimazole	Clc1ccccc1C(c1ccccc1)(c1ccccc1)n1ccnc1	1			0
Coumarin	O=C1Oc2ccccc2C=C1	0	0		0
Cyclamen aldehyde	CC(Cc1ccc(cc1)C(C)C)C=O	1	1	1	1
Cytosine	NC1=NC(=O)NC=C1	0		0	1
Dicyclohexylcarbod iimide	C1CCC(CC1)N=C=NC1CCCCC1	1	1		0
Diethyl maleate	CCOC(=O)C=CC(=O)OCC	1			1
Diethyl pthalate	CCOC(=O)c1ccccc1C(=O)OCC	0			0
Diethyl sulfate	CCOS(=O)(=O)OCC	1			1
Diethylacetaldehyde	CCC(CC)C=O	1			1
Diethylenetriamine	NCCNCCN	1			1
Diglycidyl ether of Bisphenol A	CC(C)(c1ccc(OCC2CO2)cc1)c1ccc(OCC2CO2)cc1	1			1
Dihydroeugenol	CCCc1ccc(O)c(OC)c1	1	1	1	1
Dimethyl 4-cyano-4-(3-cyclopentyloxy-4-methoxyphenyl)-pimelate	COC(=O)CCC(CCC(=O)OC)(C#N)c1ccc(OC)c(OC2CCCC2)c1	0		1	1
Dimethyl carbonate	COC(=O)OC	0			0
Dimethyl Sulfate	COS(=O)(=O)OC	1			1
Dimethyl sulfoxide	CS(C)=O	1	0		0
Dinocap	CCCCCCC(C)c1cc(cc(c1OC(=O)C=CC)N(=O)=O)N(=O)=O	1	0	1	1
Dipropylene triamine	NCCCNCCCN	1			1
Dodecyl methanesulfonate	CCCCCCCCCCCCOS(C)(=O)=O	1	1		1
Endo-tropine-3- mesylate	CN1C2CCC1CC(C2)OS(C)(=O)=O	1		1	1
Ethyl (3-endo)-8- methyl-8- azabicyclo[3,2,1]- octane-3-acetate	CCOC(=O)CC1CC2CCC(C1)N2C	1	1		0
Ethyl (Z)-a-[[2-(tert-butoxy)-1,1-dimethyl-2-oxoethoxy]imino]-2-(tritylamino)thiazol-4-acetate	CCOC(=O)C(=NOC(C)(C)C(=O)OC(C)(C)C)c1csc(NC(c2ccccc2)(c2ccccc2)c2ccccc2)n1	0	0	1	1
Ethyl 1H-1,2,4-triazole-5-carboxylate	CCOC(=O)c1nnc[nH]1	0			0
Ethyl 2,6-dichloro-5-fluoro-b-oxo-3-pyridinepropanoate	CCOC(=O)CC(=O)c1cc(F)c(Cl)nc1Cl	0	0	1	1
Ethyl 4-iodobenzoate	CCOC(=O)c1ccc(I)cc1	1			0
Ethyl acrylate	CCOC(=O)C=C	1			1
Ethyl benzoylacetate	CCOC(=O)CC(=O)c1ccccc1	0			1
Ethyl vanillin	CCOc1cc(C=O)ccc1O	0	0		1
Ethyl-2-(Hydroxymethyl)-1,3-Propanediol Triacrylate	CCC(COC(=O)C=C)(COC(=O)C=C)COC(=O)C=C	0	0		1
Ethylene dimethacrylate	CC(=C)C(=O)OCCOC(=O)C(C)=C	1	0		1
Ethylenediamine	NCCN	1	0		1
Eugenol	COc1cc(CC=C)ccc1O	1	1		1
Farnesal	CC(C)=CCCC(C)=CCCC(C)=CC=O	1	1		1
Fluorescein isothiocyanate	Oc1ccc2c(Oc3cc(O)ccc3C22OC(=O)c3cc(ccc23)N=C=S)c1	1	0		1
Fumaric acid	OC(=O)C=CC(O)=O	0			1
Furil	O=C(C(=O)c1ccco1)c1ccco1	0			1
Geraniol	CC(C)=CCCC(C)=CCO	1	1		1
Glutaraldehyde	O=CCCCC=O	1			1
Glycerol	OCC(O)CO	0			0
Glyceryl thioglycolate	OCC(O)COC(=O)CS	1	0		1
Glyoxal	O=CC=O	1			1
Hexane	CCCCCC	0			0
Hydroxycitronellal	CC(CCCC(C)(C)O)CC=O	1	1		1
Hydroxyethyl-ethylenediamine	NCCNCCO	1	1		1
Imidazolidinyl urea	OCN1C(NC(=O)NCNC(=O)NC2N(CO)C(=O)NC2=O)C(=O)NC1=O	1		1	1
Iododecane	CCCCCCCCCCCCI	1	1		1
Iodohexadecane	CCCCCCCCCCCCCCCCI	1	1		1
Iodohexane	CCCCCCI	0	1		1
Iodononane	CCCCCCCCCI	1			1
Iodooctadecane	CCCCCCCCCCCCCCCCCCI	0	1		1
Iodopropynyl butylcarbamate	CCCCNC(=O)OC#CCI	1			1
Iodotetradecane	CCCCCCCCCCCCCCI	1	1		1
Isoeugenol	COc1cc(C=CC)ccc1O	1	1		1
Isononanoyl chloride	CC(C)CCCCCC(Cl)=O	1	1		1
Isopropanol	CC(C)O	0			0
Isopropyl dicyandiamide	CC(C)N(C#N)C#N	0			0
Isopropyl eugenol	CC(C)Oc1cc(CC=C)ccc1O	0	1		1
Isopropyl isoeugenol	CC=Cc1ccc(O)c(OC(C)C)c1	1		1	1
Isopropyl myristate	CCCCCCCCCCCCCC(=O)OC(C)C	1	1		0
Kanamycin	NCC1OC(OC2C(N)CC(N)C(OC3OC(CO)C(O)C(N)C3O)C2O)C(O)C(O)C1O	0	0	1	1
Lactic acid	CC(O)C(O)=O	0	0		0
Lauryl gallate	CCCCCCCCCCCCOC(=O)c1cc(O)c(O)c(O)c1	1	0		1
Lauryl sulfate	CCCCCCCCCCCCOS(O)(=O)=O	1	1		0
Limonene	CC(=C)C1CCC(C)=CC1	1			0
Linalool aldehyde	CC(C=O)=CCCC(C)(O)C=C	1	1		1
Linoleic acid	CCCCCC=CCC=CCCCCCCCC(O)=O	1	1		0
Linolenic acid	CCC=CCC=CCC=CCCCCCCCC(O)=O	1	1		0
m-Chloropropiophenone	CCC(=O)c1cccc(Cl)c1	0		0	1
Methyl 2-nonynoate	CCCCCCC#CC(=O)OC	1	1		1
Methyl 4-(bromomethyl)benzoate	COC(=O)c1ccc(CBr)cc1	1		1	1
Methyl 4-hydroxybenzoate	COC(=O)c1ccc(O)cc1	0	0		0
Methyl acrylate	COC(=O)C=C	1			1
Methyl dodecanesulfonate	CCCCCCCCCCCCS(=O)(=O)OC	1	1		1
Methyl hexadec-1-ene-1- sulfonate	CCCCCCCCCCCCCCC=CS(=O)(=O)OC	1	1		1
Methyl hexadecane sulfonate	CCCCCCCCCCCCCCCCS(=O)(=O)OC	1	1		1
Methyl methacrylate	COC(=O)C(C)=C	1	1		1
Methyl methanesulfonate	COS(C)(=O)=O	1			1
Methyl pyruvate	COC(=O)C(C)=O	1			1
Methyl salicylate	COC(=O)c1ccccc1O	0	0		0
Methyl(2-sulfomethyl)octadecanoate	CCCCCCCCCCCCCCCCC(CS(O)(=O)=O)C(=O)OC	1			0
m-Phenylenebis-(methylamine)	CNc1cccc(NC)c1	1		1	1
N-(2-Chloro-4-pyrimidinyl)-2,3-dimethyl-2H-indazol-6-amine	Cc1n(C)nc2cc(Nc3ccnc(Cl)n3)ccc12	0	0	0	1
N-(2-Chloro-4-pyrimidinyl)-N,2,3-trimethyl-2H-indazol-6-amine	CN(c1ccc2c(C)n(C)nc2c1)c1ccnc(Cl)n1	0	0	0	1
N-(3,4-Dichlorophenyl)-n'- (1-methylethyl)- imidodicarbon-imidic diamide monohydrochloride	CC(C)N(C(N)=N)C(=N)Nc1ccc(Cl)c(Cl)c1	1			1
N-(4-Methoxyphenyl)-3-oxobutanamide	COc1ccc(NC(=O)CC(C)=O)cc1	1	0	1	1
N-[(1,1-Dimethylethoxy)-carbonyl]-L- tyrosine, ethyl ester	CCOC(=O)C(Cc1ccc(O)cc1)NC(=O)OC(C)(C)C	0	0	1	1
N-[(1-Butyl-4-piperidinyl)methyl]-3,4-dihydro-2H-[1,3]oxazino[3,2-a]indole-10-carboxamide	CCCCN1CCC(CNC(=O)c2c3OCCCn3c3ccccc23)CC1	0			0
N-[2-(Diethylamino)ethyl]-2-[[(4-fluorophenyl)-methyl]thio]-4,5,6,7-tetrahydro-4-oxo-n-[[4'-(trifluoromethyl)-[1,1'-biphenyl]-4-yl]methyl]-1h-cyclopentapyrim-idine-1-acetamide	CCN(CC)CCN(Cc1ccc(cc1)-c1ccc(cc1)C(F)(F)F)C(=O)CN1C2=C(CCC2)C(=O)N=C1SCc1ccc(F)cc1	1	0	1	1
N-{[(1,1-Dimethylethyl)oxy] carbonyl}-4-fluoro- b-(4-fluorophenyl)-L- phenylalanine	CC(C)(C)OC(=O)NC(C(c1ccc(F)cc1)c1ccc(F)cc1)C(O)=O	0	0	1	1
N-{2-(Benzyloxy)-5-[(1R)-2-bromo-1-hydroxyethyl]phenyl}formamide	OC(CBr)c1ccc(OCc2ccccc2)c(NC=O)c1	0	0	1	1
N-Ethyl-N-nitrosourea	CCN(N=O)C(N)=O	1			1
N-Isopropyl-n-phenyl-2-(2-phenylamino-phenylamino)-acetamide	CC(C)N(C(=O)CNc1ccccc1Nc1ccccc1)c1ccccc1	1		1	1
N-Methyl-N-nitrosourea	CN(N=O)C(N)=O	1			1
Nonanoyl chloride	CCCCCCCCC(Cl)=O	1	1		1
Norbornene fluoroalcohol	FOC1=C2CCC(C2)C1	1	0	1	1
Octanoic acid	CCCCCCCC(O)=O	0	1		0
Octanol	CCCCCCCCO	1	1		0
Oleic acid	CCCCCCCCC=CCCCCCCCC(O)=O	1	1		0
Oleyl methanesulfonate	CCCCCCCCC=CCCCCCCCCOS(C)(=O)=O	1	1		1
Oripavine	COC1=CC=C2C3Cc4ccc(O)c5OC1C2(CCN3C)c45	1			0
Oxalic acid	OC(=O)C(O)=O	1	0		0
Oxyfluorfen	CCOc1cc(Oc2ccc(cc2Cl)C(F)(F)F)ccc1N(=[O])=[O]	0	0		0
Palmitoyl chloride	CCCCCCCCCCCCCCCC(Cl)=O	1	1		1
Penicillin G	CC1(C)SC2C(NC(=O)Cc3ccccc3)C(=O)N2C1C(O)=O	1	0		1
Pentachlorophenol	Oc1c(Cl)c(Cl)c(Cl)c(Cl)c1Cl	1			0
Pentaerythritol triacrylate	OCC(COC(=O)C=C)(COC(=O)C=C)COC(=O)C=C	0	0		1
Perillaldehyde	CC(=C)C1CCC(C=O)=CC1	1			1
Phenyl benzoate	O=C(Oc1ccccc1)c1ccccc1	1	1		1
Phenylacetaldehyde	O=CCc1ccccc1	1	1		1
Phenylmethyl 2-(4-fluoro-2-methylphenyl)-4-oxo-3,4-dihydro-1 (2H)-pyridine-carboxylate	Cc1cc(F)ccc1C1CC(=O)C=CN1C(=O)OCc1ccccc1	0	0	1	1
p-Methylhydrocinnamic aldehyde	Cc1ccc(CCC=O)cc1	1	1		1
Propylene glycol	CC(O)CO	0			0
Propylparaben	CCCOC(=O)c1ccc(O)cc1	0	0		0
p-tert-Butyl-a-ethyl-hydrocinnamal	CC(Cc1ccc(cc1)C(C)(C)C)C=O	1	1		1
p-tert-Butylphenyl Glycidyl Ether	CC(C)(C)c1ccc(OCC2CO2)cc1	1	1		1
Pyridine	c1ccncc1	1			0
Quinoxyfen	Fc1ccc(Oc2ccnc3cc(Cl)cc(Cl)c23)cc1	0	0		0
R-Carvone	CC(=C)C1CC=C(C)C(=O)C1	1			1
Resorcinol	Oc1cccc(O)c1	1	1		1
Rifamycin	COC1C=COC2(C)Oc3c(C2=O)c2c(O)cc(NC(=O)C(C)=CC=CC(C)C(O)C(C)C(O)C(C)C(OC(C)=O)C1C)c(O)c2c(O)c3C	0	0	1	1
Saccharine	O=C1NS(=O)(=O)c2ccccc12	0	0		1
Salicylic acid	OC(=O)c1ccccc1O	0	0		0
Sodium ethyl xanthate	CCOC(S)=S	1		1	1
Sodium lauroyl lactylate	CCCCCCCCCCCC(=O)OC(C)C(=O)OC(C)C(O)=O	1	0	1	1
Sodium-3,3,5-trimethyl-benzenesulfonate	CC(CC(=O)Oc1ccc(cc1)S(O)(=O)=O)CC(C)(C)C	1	1	1	1
Squalene	CC(C)=CCCC(C)=CCCC(C)=CCCC=C(C)CCC=C(C)CCC=C(C)C	1			0
Succinic Acid	OC(=O)CCC(O)=O	0	0		0
Sulfanilamide	Nc1ccc(cc1)S(N)(=O)=O	0	0		1
Sulfanilic acid	Nc1ccc(cc1)S(O)(=O)=O	0	0		1
Tartaric acid	OC(C(O)C(O)=O)C(O)=O	0	0		0
tert-Butyl 3-Aminobenzoate	CC(C)(C)OC(=O)c1cccc(N)c1	0	0	1	1
Tetramethyl thiuram disulfide	CN(C)C(=S)SSC(=S)N(C)C	1			1
Trifluralin	CCCN(CCC)c1c(cc(cc1N(=O)=O)C(F)(F)F)N(=O)=O	1			0
Trimethylhexamine diamine	CC(CCCCN)C(C)(C)N	1		1	1
Undec-10-enal	C=CCCCCCCCCC=O	1	1		1
Undecylenic acid	OC(=O)CCCCCCCCC=C	1	1		0
Vanillin	COc1cc(C=O)ccc1O	0	0		1
Veratraldehyde	COc1ccc(C=O)cc1OC	1	0	0	1
Vinylidene dichloride	ClC(Cl)=C	0			0
Vinylpyridine	C=Cc1ccncc1	1			1

## Sheet: ToxAlerts
Name	SMILES	LLNA	QSAR	TA240	TA245	TA452	TA453	TA467	TA586	TA278	TA297	TA264	TA292	TA579	TA248	TA469	TA249	TA311	TA239	TA473	TA254	TA271	TA463	TA580	TA585	TA290	TA457	TA468	TA233	TA274	TA244	TA298	TA310	TA451	TA592	TA260	TA275	TA284	TA448	TA299	TA444	TA255	TA454	TA598	TA445	TA312	TA596	TA293	TA302
Rifamycin	COC1C=COC2(C)Oc3c(C2=O)c2c(O)cc(NC(=O)C(C)=CC=CC(C)C(O)C(C)C(O)C(C)C(OC(C)=O)C1C)c(O)c2c(O)c3C	0	0	0	1	0	0	0	0	0	1	0	1	0	1	0	1	1	0	1	0	0	0	0	0	0	0	0	0	0	0	0	0	0	0	0	0	0	0	0	0	0	0	0	0	1	0	1	1
3-Hydroxy-4-methoxybenzaldehyde	COc1ccc(C=O)cc1O	0	0	0	0	0	0	0	0	1	0	1	0	0	0	0	0	0	1	1	0	0	0	0	0	1	0	0	0	0	1	1	1	1	1	0	0	0	0	0	0	0	0	0	0	0	0	0	0
(2E)-2-[(2-Formyl- 4-hydroxyphenyl)- methylidene]-butanedioic acid	OC(=O)CC(=Cc1ccc(O)cc1C=O)C(O)=O	1		0	0	0	0	0	0	0	0	1	0	0	0	1	0	0	0	0	0	0	0	0	0	1	0	0	0	0	1	0	0	1	0	0	0	0	0	0	0	0	0	0	0	0	0	0	0
(2E)-2-Decenal	CCCCCCCC=CC=O	1	1	1	0	0	0	1	0	0	0	1	1	0	0	0	0	0	0	0	0	0	0	0	0	0	0	0	0	0	0	0	0	0	0	0	0	0	0	0	0	0	0	0	0	0	0	0	0
Vanillin	COc1cc(C=O)ccc1O	0	0	0	0	0	0	0	0	1	0	1	0	0	0	0	0	0	1	1	0	0	0	0	0	1	0	0	0	0	1	1	1	1	1	0	0	0	0	0	0	0	0	0	0	0	0	0	0
(2E,4E)-2,4-Hexadienal	CC=CC=CC=O	1	1	1	0	0	0	1	0	0	0	1	1	0	0	0	0	0	0	0	0	0	0	0	0	0	0	0	0	0	0	0	0	0	0	0	0	0	0	0	0	0	0	0	0	0	0	0	0
Ethyl vanillin	CCOc1cc(C=O)ccc1O	0	0	0	0	0	0	0	0	1	0	1	0	0	0	0	0	0	1	1	0	0	0	0	0	1	0	0	0	0	1	1	1	1	0	0	0	0	0	0	0	0	0	0	0	0	0	0	0
(3-Endo)-8-methyl- 8-azabicyclo[3,2,1]- octan-3-ol	CN1C2CCC1CC(O)C2	1		0	0	0	0	0	0	0	0	0	0	0	0	0	0	0	0	0	0	0	0	0	0	0	0	0	0	0	0	0	0	0	0	0	0	0	0	0	0	0	0	0	0	0	0	0	0
(3R,3aS,6aR)-Hexahydrofuro[2,3-b]furan-3-yl 4-nitrophenyl carbonate	O=C(OC1COC2OCCC12)Oc1ccc(cc1)N(=O)=O	1		0	0	0	0	0	0	0	0	0	0	1	0	0	0	0	0	0	0	0	0	0	0	1	0	0	0	0	0	0	0	0	0	0	0	0	0	0	0	0	0	0	0	0	0	0	0
(4E)-4-(Ethoxymethylene)-2-phenyl-1,3-oxazol-5(4H)-one	CCOC=C1N=C(OC1=O)c1ccccc1	1	0	0	0	0	0	0	0	0	0	0	1	0	1	0	0	0	0	0	0	0	0	1	0	0	0	0	0	0	0	0	0	0	0	0	0	0	0	0	0	0	0	0	0	0	0	0	0
N-{2-(Benzyloxy)-5-[(1R)-2-bromo-1-hydroxyethyl]phenyl}formamide	OC(CBr)c1ccc(OCc2ccccc2)c(NC=O)c1	0	0	0	0	0	0	0	0	0	0	1	0	0	0	0	1	1	0	1	0	0	1	0	0	0	0	0	1	0	0	0	0	0	0	0	0	0	0	0	0	0	0	0	0	1	1	0	0
(E)-Anethol	COc1ccc(C=CC)cc1	1	1	0	0	0	0	1	0	0	0	0	0	0	0	0	0	0	0	0	0	0	0	0	0	0	0	0	0	0	0	0	0	0	0	0	0	0	0	0	0	0	0	0	0	0	0	0	0
[4S-[1(E),4alpha,5alpha]]-1-[3-[2-[4-Methoxy-2-(phenylmethoxy)-benzoyl]-4-propoxyphenyl]-1-oxo-2-propenyl]-3,4-dimethyl-5-phenyl-2-imidazoli-dinone	CCCOc1ccc(C=CC(=O)N2C(C(C)N(C)C2=O)c2ccccc2)c(c1)C(=O)c1ccc(OC)cc1OCc1ccccc1	0	0	0	1	0	0	1	1	0	0	0	1	0	0	1	0	0	0	0	0	0	1	1	0	0	0	0	0	0	0	0	0	0	0	0	0	0	0	0	0	0	0	0	0	0	0	0	0
(16-b)-21-(Acetyloxy)-17-hydroxy-16-methylpregna-1,4,9(11)-triene-3,20-dione	CC1CC2C3CCC4=CC(=O)C=CC4(C)C3=CCC2(C)C1(O)C(=O)COC(C)=O	0	0	1	1	1	1	1	1	0	0	0	0	0	0	0	0	0	0	0	0	0	0	0	0	0	0	0	0	0	0	0	0	0	0	0	0	0	0	0	0	0	0	0	0	0	0	0	0
1 -Phenyloctane-1,3-dione	CCCCCC(=O)CC(=O)c1ccccc1	1	1	0	0	0	0	0	0	0	0	0	0	0	0	0	0	0	0	0	0	0	0	0	0	0	0	0	0	0	0	0	0	0	0	0	0	0	0	0	0	0	0	0	0	0	0	0	0
Atrazine	CCNc1nc(Cl)nc(NC(C)C)n1	0		0	0	0	0	0	0	0	0	0	0	0	0	0	1	1	0	0	0	0	0	0	0	0	0	0	0	0	0	0	0	0	0	1	1	1	1	0	0	0	0	0	0	0	0	0	0
1-(2',3',4',5'-Tetramethylphenyl)butane-1,3-dione	CC(=O)CC(=O)c1cc(C)c(C)c(C)c1C	1	1	0	0	0	0	0	0	0	0	0	0	0	0	0	0	0	0	0	0	0	0	0	0	0	0	0	0	0	0	0	0	0	0	0	0	0	0	0	0	0	0	0	0	0	0	0	0
1-(2',5'-diethylphenyl)butane-1,3-dione	CCc1ccc(CC)c(c1)C(=O)CC(C)=O	1	1	0	0	0	0	0	0	0	0	0	0	0	0	0	0	0	0	0	0	0	0	0	0	0	0	0	0	0	0	0	0	0	0	0	0	0	0	0	0	0	0	0	0	0	0	0	0
1-(2,5-Dimethylphenyl)-1,3-butanedione	CC(=O)CC(=O)c1cc(C)ccc1C	1		0	0	0	0	0	0	0	0	0	0	0	0	0	0	0	0	0	0	0	0	0	0	0	0	0	0	0	0	0	0	0	0	0	0	0	0	0	0	0	0	0	0	0	0	0	0
2-[4-({2,6-Dimethoxy-4-methyl-5-[3-(trifluoromethyl)phenoxy]-8-quinolinyl}amino)pentyl]-1H-isoindole-1,3(2H)-dione	COc1cc(C)c2c(Oc3cccc(c3)C(F)(F)F)c(OC)cc(NC(C)CCCN3C(=O)c4ccccc4C3=O)c2n1	0	0	0	0	0	0	0	0	0	0	0	0	0	0	0	1	1	0	1	0	0	0	1	1	0	0	0	0	0	0	0	0	0	0	0	0	0	0	0	0	0	0	0	0	0	0	0	0
Isopropyl eugenol	CC(C)Oc1cc(CC=C)ccc1O	0	1	0	0	0	0	0	0	0	0	0	0	0	0	0	0	0	1	1	0	0	0	0	0	0	0	0	0	0	0	1	1	0	0	0	0	0	0	0	0	0	0	1	0	0	0	0	0
N-(2-Chloro-4-pyrimidinyl)-2,3-dimethyl-2H-indazol-6-amine	Cc1n(C)nc2cc(Nc3ccnc(Cl)n3)ccc12	0	0	0	0	0	0	0	0	0	0	0	0	0	0	0	1	1	0	0	0	0	0	0	0	0	0	0	0	0	0	0	0	0	0	1	1	0	0	0	0	0	0	0	1	0	0	0	0
1-(p-methoxyphenyl)-1- penten-3-one	CCC(=O)C=Cc1ccc(OC)cc1	1	1	0	0	0	0	1	0	0	0	0	1	0	0	1	0	0	0	0	0	0	0	0	0	0	0	0	0	0	0	0	0	0	0	0	0	0	0	0	0	0	0	0	0	0	0	0	0
1-(Prop-2-enoyloxy)-2-[(prop-2-enoyloxy)methyl]pentan-3-yl prop-2-enoate	CCC(OC(=O)C=C)C(COC(=O)C=C)COC(=O)C=C	1	0	0	0	0	0	1	0	0	0	0	1	0	0	0	0	0	0	0	0	0	0	0	0	0	0	1	0	0	0	0	0	0	0	0	0	0	0	0	0	0	0	0	0	0	0	0	0
1-[1-3-(1,3-Benzodioxol-5-yl)-(2-benzyloxy-4- methoxyphenyl)-1- hydroxy-6- propoxy-2-indanoyl]-3,4- dimethyl-5-phenyl-imidazolidinone	CCCOc1ccc2C(C(C(=O)N3C(C(C)N(C)C3=O)c3ccccc3)C(O)(c2c1)c1ccc(OC)cc1OCc1ccccc1)c1ccc2OCOc2c1	0	0	0	0	0	0	0	1	0	0	0	0	0	0	0	0	0	0	1	0	0	1	1	0	0	0	0	0	0	0	0	0	0	0	0	0	0	0	0	0	0	0	0	0	0	0	0	0
4'-(Trifluoromethyl)-[1,1'- biphenyl]-4-carboxaldehyde	FC(F)(F)c1ccc(cc1)-c1ccc(C=O)cc1	0		0	0	0	0	0	0	0	0	1	0	0	0	0	0	0	0	0	0	0	0	0	0	1	0	0	0	0	1	0	0	1	0	0	0	0	0	0	0	0	0	0	0	0	0	0	0
Benzaldehyde	O=Cc1ccccc1	0	1	0	0	0	0	0	0	0	0	1	0	0	0	0	0	0	0	0	0	0	0	0	0	1	0	0	0	0	1	0	0	1	0	0	0	0	0	0	0	0	0	0	0	0	0	0	0
(2-Bromo-5-propoxyphenyl)-(2-hydroxy-4-methoxyphenyl)methanone	CCCOc1ccc(Br)c(c1)C(=O)c1ccc(OC)cc1O	0	0	0	1	0	0	0	0	1	1	0	0	0	0	0	0	0	0	0	0	0	0	0	0	0	0	0	0	0	0	0	0	0	0	0	0	0	0	0	0	0	0	0	0	0	0	0	0
1,1-Dimethylethyl3-[[[[(3s)-2,3,4,5-tetrahydro-1-[2-[(1-methylethyl)pheny lamino]-2-oxoethyl]-2,4-dioxo-5-phenyl-1h-1,5-benzodiazepin-3-yl]amino]carbonyl]amino]benzoate	CC(C)N(C(=O)CN1c2ccccc2N(c2ccccc2)C(=O)C(NC(=O)Nc2cccc(c2)C(=O)OC(C)(C)C)C1=O)c1ccccc1	1	0	0	0	0	0	0	1	0	0	0	0	1	0	0	1	1	0	0	0	0	0	0	0	0	0	0	0	0	0	0	0	0	0	0	0	0	0	0	0	0	0	0	0	1	0	0	0
(2E)-2-Methyl-2-butenal	CC=C(C)C=O	0	1	1	0	0	0	0	0	0	0	1	1	0	0	0	0	0	0	0	0	0	0	0	0	0	0	0	0	0	0	0	0	0	0	0	0	0	0	0	0	0	0	0	0	0	0	0	0
1,2-Benzisothiazolin-3-one	O=C1NSc2ccccc12	1		0	0	0	0	0	0	0	0	0	0	0	0	0	0	0	0	0	0	0	0	0	0	0	0	0	0	0	0	0	0	0	0	0	0	0	0	0	0	0	0	0	0	0	0	0	0
1,2-Diaminocyclohexane	NC1CCCCC1N	1	1	0	0	0	0	0	0	0	0	0	0	0	0	0	0	0	0	0	0	0	0	0	0	0	0	0	0	0	0	0	0	0	0	0	0	0	0	0	0	0	0	0	0	0	0	0	0
1,2-Dibromo-2,4-dicyanobutane	BrCC(Br)(CCC#N)C#N	1		0	0	0	0	0	0	0	0	0	0	0	0	0	0	0	0	0	0	0	0	0	0	0	0	0	1	0	0	0	0	0	0	0	0	0	0	0	0	0	0	0	0	0	0	0	0
1,3-benzenedimethanamine	NCC1=CC(CN)=CC=C1	1		0	0	0	0	0	0	0	0	0	0	0	0	0	0	0	0	0	0	0	0	0	0	0	1	0	0	0	0	0	0	0	0	0	0	0	0	0	0	0	0	0	0	0	0	0	0
1,3-Benzodioxazole-5- sulphonyl chloride	ClS(=O)(=O)c1ccc2OCOc2c1	1		0	0	0	0	0	0	0	0	0	0	0	0	0	0	0	0	1	0	0	0	0	0	0	0	0	0	0	0	0	0	0	0	0	0	0	0	0	0	0	0	0	0	0	0	0	0
1,1-Dimethylethyl[(1s)-2-[4-[(2-methyl-4-thiazolyl)methoxy]phenyl]-1-(2s)-oxiranylethyl]-carbamate	Cc1nc(COc2ccc(CC(NC(=O)OC(C)(C)C)C3CO3)cc2)cs1	0	0	0	0	0	0	0	0	0	0	0	0	0	0	0	0	0	0	0	1	1	1	0	0	0	0	0	0	0	0	0	0	0	0	0	0	0	0	0	0	0	0	0	0	0	0	0	0
1,4-Dihydroquinone	Oc1ccc(O)cc1	1	1	0	0	0	0	0	0	0	0	0	0	0	0	0	0	0	0	0	0	0	0	0	0	0	0	0	0	0	0	0	0	0	0	0	0	0	0	0	0	0	0	0	0	0	0	1	1
1,5-Dimethyl-3-(1-oxo-2-propenyl)-4-phenyl-2-imidazolidinone	CC1C(N(C(=O)C=C)C(=O)N1C)c1ccccc1	1	0	0	0	0	0	1	1	0	0	0	1	0	0	0	0	0	0	0	0	0	0	1	0	0	0	1	0	0	0	0	0	0	0	0	0	0	0	0	0	0	0	0	0	0	0	0	0
1-[3-(Cyclopentyloxy)-4-methoxy-phenyl]-4-oxocyclohexane carbonitrile	COc1ccc(cc1OC1CCCC1)C1(CCC(=O)CC1)C#N	0	0	0	1	0	0	0	0	0	0	0	0	0	0	0	0	0	1	1	0	0	0	0	0	0	0	0	0	0	0	0	0	0	0	0	0	0	0	0	0	0	0	0	0	0	0	0	0
1,6-Bis(2,3-epoxypropoxy)-hexane	C(CCCOCC1CO1)CCOCC1CO1	1	1	0	0	0	0	0	0	0	0	0	0	0	0	0	0	0	0	0	1	1	0	0	0	0	0	0	0	0	0	0	0	0	0	0	0	0	0	0	0	0	0	0	0	0	0	0	0
2-(4-Oxopentyl)-1H-isoindole-1,3(2H)-dione	CC(=O)CCCN1C(=O)c2ccccc2C1=O	0	0	0	1	0	0	0	0	0	0	0	0	0	0	0	0	0	0	0	0	0	0	1	1	0	0	0	0	0	0	0	0	0	0	0	0	0	0	0	0	0	0	0	0	0	0	0	0
2,3,3a,4,5,6a-Hexahydrofuro[5,4-b]furan-3-yl N-[3-(1,3-benzodioxol-5-ylsulfonyl-isobutyl-amino)-2-hydroxy-1-[[4-[(2-methylthiazol-4-yl)methoxy]phenyl]methyl]propyl]carbamate	CC(C)CN(CC(O)C(Cc1ccc(OCc2csc(C)n2)cc1)NC(=O)OC1COC2OCCC12)S(=O)(=O)c1ccc2OCOc2c1	0	0	0	0	0	0	0	0	0	0	0	0	0	0	0	0	0	0	1	0	0	1	0	0	1	0	0	0	0	0	0	0	0	0	0	0	0	0	0	0	0	0	0	0	0	0	0	0
2,6-Dimethoxy-4-methyl-5-[3-(trifluoromethyl)phenoxy]-8-quinolinamine	COc1cc(C)c2c(Oc3cccc(c3)C(F)(F)F)c(OC)cc(N)c2n1	0	0	0	0	0	0	0	0	0	0	0	0	0	0	0	1	1	0	1	0	0	0	0	0	0	0	0	0	0	0	0	0	0	0	0	0	0	0	0	0	0	0	0	0	0	0	0	0
Ethyl 2,6-dichloro-5-fluoro-b-oxo-3-pyridinepropanoate	CCOC(=O)CC(=O)c1cc(F)c(Cl)nc1Cl	0	0	0	1	0	0	0	0	0	0	0	0	0	0	0	0	0	0	0	0	0	0	0	0	0	0	0	0	0	0	0	0	0	0	0	0	0	0	1	1	0	0	0	0	0	0	0	0
Ethyl-2-(Hydroxymethyl)-1,3-Propanediol Triacrylate	CCC(COC(=O)C=C)(COC(=O)C=C)COC(=O)C=C	0	0	0	0	0	0	1	0	0	0	0	1	0	0	0	0	0	0	0	0	0	0	0	0	0	0	1	0	0	0	0	0	0	0	0	0	0	0	0	0	0	0	0	0	0	0	0	0
12-Bromo-1-dodecanol	OCCCCCCCCCCCCBr	1	1	0	0	0	0	0	0	0	0	0	0	0	0	0	0	0	0	0	0	0	0	0	0	0	0	0	1	1	0	0	0	0	0	0	0	0	0	0	0	0	0	0	0	0	0	0	0
12-Bromododecanoic acid	OC(=O)CCCCCCCCCCCBr	1	1	0	0	0	0	0	0	0	0	0	0	0	0	0	0	0	0	0	0	0	0	0	0	0	0	0	1	1	0	0	0	0	0	0	0	0	0	0	0	0	0	0	0	0	0	0	0
14-Hydroxynor-morphinone	Oc1ccc2CC3NCCC45C(Oc1c24)C(=O)C=CC35O	1	0	0	0	0	1	1	0	0	0	0	1	0	0	0	0	0	0	1	0	0	0	0	0	0	0	0	0	0	0	1	1	0	0	0	0	0	0	0	0	0	0	0	0	0	0	0	0
1-Chloro-2,4- dinitrobenzene	Clc1ccc(cc1N(=O)=O)N(=O)=O	1		0	0	0	0	0	0	0	0	0	0	0	0	0	0	0	0	0	0	0	0	0	0	0	0	0	0	0	0	0	0	0	0	0	0	1	0	0	0	0	0	0	0	0	0	0	0
1-Chloromethyl- pyrene	ClCc1ccc2ccc3cccc4ccc1c2c34	1		0	0	0	0	0	0	0	0	0	0	0	0	0	0	0	0	0	0	0	0	0	0	0	0	0	1	1	0	0	0	0	0	0	0	0	0	0	0	0	0	0	0	0	0	0	0
1-Chlorooctadecane	CCCCCCCCCCCCCCCCCCCl	1	1	0	0	0	0	0	0	0	0	0	0	0	0	0	0	0	0	0	0	0	0	0	0	0	0	0	1	1	0	0	0	0	0	0	0	0	0	0	0	0	0	0	0	0	0	0	0
1-Iododecane	CCCCCCCCCCI	1	1	0	0	0	0	0	0	0	0	0	0	0	0	0	0	0	0	0	0	0	0	0	0	0	0	0	1	0	0	0	0	0	0	0	0	0	0	0	0	0	0	0	0	0	0	0	0
1-Methyl-3-nitro- nitrosoguanidine	CN(N=O)C(=N)NN(=O)=O	1		0	0	0	0	0	0	0	0	0	0	0	0	0	0	0	0	0	0	0	0	0	0	0	0	0	0	0	0	0	0	0	0	0	0	0	0	0	0	0	0	0	0	0	0	0	0
1-Naphthol	Oc1cccc2ccccc12	1		0	0	0	0	0	0	0	0	0	0	0	0	0	0	0	0	0	0	0	0	0	0	0	0	0	0	0	0	0	0	0	0	0	0	0	0	0	0	0	0	0	0	0	0	0	0
1-Phenyl-1,2-propanedione	CC(=O)C(=O)c1ccccc1	1		0	0	0	0	0	0	0	0	0	0	0	1	0	0	0	0	0	0	0	0	0	0	0	0	1	0	0	0	0	0	0	0	0	0	0	0	0	0	0	0	0	0	0	0	0	0
1-Phenyl-2-methylbutane-1,3-dione	CC(C(C)=O)C(=O)c1ccccc1	1	1	0	0	0	0	0	0	0	0	0	0	0	0	0	0	0	0	0	0	0	0	0	0	0	0	0	0	0	0	0	0	0	0	0	0	0	0	0	0	0	0	0	0	0	0	0	0
N-(2-Chloro-4-pyrimidinyl)-N,2,3-trimethyl-2H-indazol-6-amine	CN(c1ccc2c(C)n(C)nc2c1)c1ccnc(Cl)n1	0	0	0	0	0	0	0	0	0	0	0	0	0	0	0	0	0	0	0	0	0	0	0	0	0	0	0	0	0	0	0	0	0	0	1	1	0	0	0	0	0	0	0	1	0	0	0	0
2-(2,4-Diaminophenoxy)ethanol	Nc1ccc(OCCO)c(N)c1	1		0	0	0	0	0	0	0	0	0	0	0	0	0	1	1	0	1	0	0	0	0	0	0	0	0	0	0	0	0	0	0	0	0	0	0	0	0	0	0	0	0	0	0	0	0	0
2-(3,4-Dimethylphenyl)-5-methyl-2,4-dihydro-3H-pyrazol-3-one	CC1=CC(=O)N(N1)c1ccc(C)c(C)c1	1		0	0	0	0	0	0	0	0	0	0	0	0	0	0	0	0	0	0	0	0	0	0	0	0	0	0	0	0	0	0	0	0	0	0	0	0	0	0	0	0	0	0	0	0	0	0
2-(4-Amino-2nitro-phenylamino)-ethanol	Nc1ccc(NCCO)c(c1)N(=O)=O	1	1	0	0	0	0	0	0	0	0	0	0	0	0	0	1	1	0	0	0	0	0	0	0	0	0	0	0	0	0	0	0	0	0	0	0	0	0	0	0	0	0	0	0	0	0	0	0
Pentaerythritol triacrylate	OCC(COC(=O)C=C)(COC(=O)C=C)COC(=O)C=C	0	0	0	0	0	0	1	0	0	0	0	1	0	0	0	0	0	0	0	0	0	0	0	0	0	0	1	0	0	0	0	0	0	0	0	0	0	0	0	0	0	0	0	0	0	0	0	0
Phenylmethyl 2-(4-fluoro-2-methylphenyl)-4-oxo-3,4-dihydro-1 (2H)-pyridine-carboxylate	Cc1cc(F)ccc1C1CC(=O)C=CN1C(=O)OCc1ccccc1	0	0	0	0	0	0	1	1	0	0	0	1	0	0	0	0	0	0	0	0	0	0	0	0	0	0	0	0	0	0	0	0	0	0	0	0	0	0	0	0	0	0	0	0	0	0	0	0
2-(4-tert-Amylcyclohexyl)acetaldehyde	CCC(C)(C)C1CCC(CC=O)CC1	1	1	0	0	0	0	0	0	0	0	1	0	0	0	0	0	0	0	0	0	0	0	0	0	1	0	0	0	0	1	0	0	0	0	0	0	0	0	0	0	0	0	0	0	0	0	0	0
1-(2',3',4',5'-Tetramethylphenyl)-3-(4'-tetrabutylphenyl)- propane-1,3-dione	CCCCc1ccc(cc1)C(=O)CC(=O)c1cc(C)c(C)c(C)c1C	0		0	0	0	0	0	0	0	0	0	0	0	1	1	0	0	0	0	0	0	0	0	0	0	0	0	0	0	0	0	0	0	0	0	0	0	0	0	0	0	0	0	0	0	0	0	0
2(E)-Hexenal	CCCC=CC=O	1		1	0	0	0	1	0	0	0	1	1	0	0	0	0	0	0	0	0	0	0	0	0	0	0	0	0	0	0	0	0	0	0	0	0	0	0	0	0	0	0	0	0	0	0	0	0
2-(Hydroxymethyl)pentane-1,3-diol	CCC(O)C(CO)CO	1		0	0	0	0	0	0	0	0	0	0	0	0	0	0	0	0	0	0	0	0	0	0	0	0	0	0	0	0	0	0	0	0	0	0	0	0	0	0	0	0	0	0	0	0	0	0
2,2,6,6-Tetramethyl-heptane-3,5-dione	CC(C)(C)C(=O)CC(=O)C(C)(C)C	1		1	0	0	1	0	0	0	0	0	1	0	1	0	0	0	0	0	0	0	0	0	0	0	0	0	0	0	0	0	0	0	0	0	0	0	0	0	0	0	0	0	0	0	0	0	0
2,2-bis-[4-(2-hydroxy-3methacryloxypropoxy)phenyl)]-propane	CC(=C)C(=O)OCC(O)COc1ccc(cc1)C(C)(C)c1ccc(OCC(O)COC(=O)C(C)=C)cc1	1	0	0	0	0	0	0	0	0	0	0	1	0	0	0	0	0	0	0	0	0	0	0	0	0	0	1	0	0	0	0	0	0	0	0	0	0	0	0	0	0	0	0	0	0	0	0	0
1(2H)-Pyridazinamine	Nn1ccccn1	0		0	0	0	0	0	0	0	0	0	0	0	0	0	1	1	0	0	0	0	0	0	0	0	0	0	0	0	0	0	0	0	0	0	0	0	0	0	0	0	0	0	0	0	0	0	0
1,3-bis(2,5-dimethylphenyl)propane-1,3-dione	Cc1ccc(C)c(c1)C(=O)CC(=O)c1cc(C)ccc1C	0		0	0	0	0	0	0	0	0	0	0	0	1	1	0	0	0	0	0	0	0	0	0	0	0	0	0	0	0	0	0	0	0	0	0	0	0	0	0	0	0	0	0	0	0	0	0
2,3-Dihydro-1,3-oxazol-2-one	O=C1NC=CO1	1		0	0	0	0	0	0	0	0	0	0	0	0	0	0	0	0	0	0	0	0	0	0	0	0	0	0	0	0	0	0	0	0	0	0	0	0	0	0	0	0	0	0	0	0	0	0
2,3-Dimethyl-2H-indazol-6-amine	Cc1n(C)nc2cc(N)ccc12	0		0	0	0	0	0	0	0	0	0	0	0	0	0	1	1	0	0	0	0	0	0	0	0	0	0	0	0	0	0	0	0	0	0	0	0	0	0	0	0	0	0	0	0	0	0	0
2,4,6-Trichloro- 1,3,5-triazine	Clc1nc(Cl)nc(Cl)n1	1		0	0	0	0	0	0	0	0	0	0	0	0	0	0	0	0	0	0	0	0	0	0	0	0	0	0	0	0	0	0	0	0	1	1	1	1	0	0	0	0	0	0	0	0	0	0
2,4-Dichloro-pyrimidine	Clc1ccnc(Cl)n1	1		0	0	0	0	0	0	0	0	0	0	0	0	0	0	0	0	0	0	0	0	0	0	0	0	0	0	0	0	0	0	0	0	0	0	0	0	0	0	0	0	0	0	0	0	0	0
2,4-Dinitrobenzene sulfonic acid	OS(=O)(=O)c1ccc(cc1N(=O)=O)N(=O)=O	1		0	0	0	0	0	0	0	0	0	0	0	0	0	0	0	0	0	0	0	0	0	0	0	0	0	0	0	0	0	0	0	0	0	0	0	0	0	0	0	0	0	0	0	0	0	0
2,4-Heptadienal	CCC=CC=CC=O	1	1	1	0	0	0	1	0	0	0	1	1	0	0	0	0	0	0	0	0	0	0	0	0	0	0	0	0	0	0	0	0	0	0	0	0	0	0	0	0	0	0	0	0	0	0	0	0
2,5-Diaminotoluene	Cc1cc(N)ccc1N	1	1	0	0	0	0	0	0	0	0	0	0	0	0	0	1	1	0	0	0	0	0	0	0	0	0	0	0	0	0	0	0	0	0	0	0	0	0	0	0	0	0	0	0	0	0	0	0
2,6,6-Trimethyl-1,3-cyclohexadiene-1-carbaldehyde	CC1=C(C=O)C(C)(C)CC=C1	1	1	1	0	1	0	0	0	0	0	1	1	0	0	0	0	0	0	0	0	0	0	0	0	0	0	0	0	0	0	0	0	0	0	0	0	0	0	0	0	0	0	0	0	0	0	0	0
2-Hydroxypropyl methacrylate	CC(O)COC(=O)C(C)=C	0	1	0	0	0	0	0	0	0	0	0	1	0	0	0	0	0	0	0	0	0	0	0	0	0	0	1	0	0	0	0	0	0	0	0	0	0	0	0	0	0	0	0	0	0	0	0	0
2,6-Dimethoxy-4-methyl-8-nitro-5-[3-(trifluoromethyl)-phenoxy]quinoline	COc1cc(C)c2c(Oc3cccc(c3)C(F)(F)F)c(OC)cc(c2n1)N(=[O])=[O]	1	0	0	0	0	0	0	0	0	0	0	0	0	0	0	0	0	0	1	0	0	0	0	0	0	0	0	0	0	0	0	0	0	0	0	0	0	0	0	0	0	0	0	0	0	0	0	0
3-{4-[(6-Bromohexyl)oxy]butyl}benzenesulfonamide	NS(=O)(=O)c1cccc(CCCCOCCCCCCBr)c1	0		0	0	0	0	0	0	0	0	0	0	0	0	0	0	0	0	0	0	0	0	0	0	0	0	0	1	1	0	0	0	0	0	0	0	0	0	0	0	0	0	0	0	0	0	0	0
2-[1-(4-Bromophenyl)-1-phenylethoxy]-N,N-dimethyl-ethanamine hydrochloride	CN(C)CCOC(C)(c1ccccc1)c1ccc(Br)cc1	1	0	0	0	0	0	0	0	0	0	0	0	0	0	0	0	0	0	0	0	0	0	0	0	0	0	0	0	0	0	0	0	0	0	0	0	0	0	0	0	0	0	0	0	0	0	0	0
3-Amino-2,3,4,5-tetrahydro-N-(1-methylethyl)-2,4-dioxo-N,5-diphenyl-1H-1,5-benzodiazepine-1-acetamide	CC(C)N(C(=O)CN1c2ccccc2N(c2ccccc2)C(=O)C(N)C1=O)c1ccccc1	0	0	0	0	0	0	0	1	0	0	0	0	1	0	0	0	0	0	0	0	0	0	0	0	0	0	0	0	0	0	0	0	0	0	0	0	0	0	0	0	0	0	0	0	0	0	0	0
4-Cyano-4-[3-(cyclopentyloxy)-4-methoxyphenyl]cyclohexanecarboxylic acid	COc1ccc(cc1OC1CCCC1)C1(CCC(CC1)C(O)=O)C#N	0	0	0	0	0	0	0	0	0	0	0	0	0	0	0	0	0	1	1	0	0	0	0	0	0	0	0	0	0	0	0	0	0	0	0	0	0	0	0	0	0	0	0	0	0	0	0	0
2-Amino-6-chloro- 4-nitrophenol	Nc1cc(cc(Cl)c1O)N(=O)=O	1		0	0	0	0	0	0	0	0	0	0	0	0	0	1	1	0	1	0	0	0	0	0	0	0	0	0	0	0	0	0	0	0	0	0	0	0	0	0	0	0	0	0	0	0	0	0
2-Amino-di- phenylamine	Nc1ccccc1Nc1ccccc1	1	1	0	0	0	0	0	0	0	0	0	0	0	0	0	1	1	0	1	0	0	0	0	0	0	0	0	0	0	0	0	0	0	0	0	0	0	0	0	0	0	0	0	0	0	0	0	0
5-({4-[(2,3-Dimethyl-2H-indazol-6-yl)(methyl)amino]-2-pyrimidinyl}amino)-2-methylbenzenesulfonamide	CN(c1ccc2c(C)n(C)nc2c1)c1ccnc(Nc2ccc(C)c(c2)S(N)(=O)=O)n1	0	0	0	0	0	0	0	0	0	0	0	0	0	0	0	1	1	0	0	0	0	0	0	0	0	0	0	0	0	0	0	0	0	0	0	0	0	0	0	0	0	0	0	0	0	0	0	0
2-Aminophenol	Nc1ccccc1O	1		0	0	0	0	0	0	0	0	0	0	0	0	0	1	1	0	1	0	0	0	0	0	0	0	0	0	0	0	0	0	0	0	0	0	0	0	0	0	0	0	0	0	0	0	0	0
2-Benzyl-tert-butylamino-3'-hydroxymethyl-4'-hydroxyaceto-phenone	CC(C)(C)N(CC(=O)c1ccc(O)c(CO)c1)Cc1ccccc1	1	0	0	1	0	0	0	0	0	0	0	0	0	0	0	0	0	0	0	0	0	0	0	0	0	0	0	0	0	0	0	0	0	0	0	0	0	0	0	0	0	0	0	0	0	0	0	0
2-Bromo-5-hydroxy-benzaldehyde	Oc1ccc(Br)c(C=O)c1	1		0	0	0	0	0	0	0	0	1	0	0	0	0	0	0	0	0	0	0	0	0	0	1	0	0	0	0	1	0	0	1	0	0	0	0	0	0	0	0	0	0	0	0	0	0	0
5-Amino-2-methylbenzene-sulfonamide	Cc1ccc(N)cc1S(N)(=O)=O	0	0	0	0	0	0	0	0	0	0	0	0	0	0	0	1	1	0	0	0	0	0	0	0	0	0	0	0	0	0	0	0	0	0	0	0	0	0	0	0	0	0	0	0	0	0	0	0
2-Bromotetra-decanoic acid	CCCCCCCCCCCCC(Br)C(O)=O	1	1	0	0	0	0	0	0	0	0	0	0	0	0	0	0	0	0	0	0	0	0	0	0	0	0	0	1	0	0	0	0	0	0	0	0	0	0	0	0	0	0	0	0	0	0	0	0
2-Chloro-1-[(3- fluorophenyl)- methoxy]-4-nitrobenzene	Fc1cccc(COc2ccc(cc2Cl)N(=O)=O)c1	1		0	0	0	0	0	0	0	0	0	0	0	0	0	0	0	0	0	0	0	1	0	0	0	0	0	0	0	0	0	0	0	0	0	0	0	0	0	0	0	0	0	0	0	0	0	0
5-Methyl-6-(trifluoromethyl)indoline	Cc1cc2CCNc2cc1C(F)(F)F	0		0	0	0	0	0	0	0	0	0	0	0	0	0	1	1	0	0	0	0	0	0	0	0	0	0	0	0	0	0	0	0	0	0	0	0	0	0	0	0	0	0	0	0	0	0	0
2-Ethylhexyl acrylate	CCCCC(CC)COC(=O)C=C	1	1	0	0	0	0	1	0	0	0	0	1	0	0	0	0	0	0	0	0	0	0	0	0	0	0	1	0	0	0	0	0	0	0	0	0	0	0	0	0	0	0	0	0	0	0	0	0
2-Hydroxyethyl acrylate	OCCOC(=O)C=C	1	0	0	0	0	0	1	0	0	0	0	1	0	0	0	0	0	0	0	0	0	0	0	0	0	0	1	0	0	0	0	0	0	0	0	0	0	0	0	0	0	0	0	0	0	0	0	0
6-Chloro-1-hexanol	OCCCCCCCl	0		0	0	0	0	0	0	0	0	0	0	0	0	0	0	0	0	0	0	0	0	0	0	0	0	0	1	1	0	0	0	0	0	0	0	0	0	0	0	0	0	0	0	0	0	0	0
2-Mercapto-benzothiazole	Sc1nc2ccccc2s1	1	0	0	0	0	0	0	0	0	0	0	0	0	0	0	0	0	0	0	0	0	0	0	0	0	0	0	0	0	0	0	0	0	0	0	0	0	0	0	0	0	0	0	0	0	0	0	0
2-Methoxy-4-methyl-4-(prop-2-en-1-yl)cyclohex-2-en-1-one	COC1=CC(C)(CC=C)CCC1=O	1	1	0	0	0	1	0	0	0	0	0	1	0	1	0	0	0	0	0	0	0	0	0	0	0	0	0	0	0	0	0	0	0	0	0	0	0	0	0	0	0	0	0	0	0	0	0	0
2-Methoxy-4-methylphenol	COc1cc(C)ccc1O	1	1	0	0	0	0	0	0	1	0	0	0	0	0	0	0	0	1	1	0	0	0	0	0	0	0	0	0	0	0	1	1	0	1	0	0	0	0	0	0	0	0	0	0	0	0	0	0
2-methoxy-5-propylphenol	CCCc1ccc(OC)c(O)c1	1	1	0	0	0	0	0	0	1	0	0	0	0	0	0	0	0	1	1	0	0	0	0	0	0	0	0	0	0	0	1	1	0	1	0	0	0	0	0	0	0	0	0	0	0	0	0	0
2-Methyl propenoic acid	CC(=C)C(O)=O	1		0	0	0	0	0	0	0	0	0	0	0	0	0	0	0	0	0	0	0	0	0	0	0	0	1	0	0	0	0	0	0	0	0	0	0	0	0	0	0	0	0	0	0	0	0	0
2-Methyl-4H-3,1-benzoxazin-4-one	CC1=Nc2ccccc2C(=O)O1	1	0	0	0	0	0	0	0	0	0	0	0	0	0	0	0	0	0	0	0	0	0	0	0	0	0	0	0	0	0	0	0	0	0	0	0	0	0	0	0	0	0	0	0	0	0	0	0
2-Methyl-5-hydroxy-ethylaminophenol	Cc1ccc(NCCO)cc1O	1		0	0	0	0	0	0	0	0	0	0	0	0	0	1	1	0	0	0	0	0	0	0	0	0	0	0	0	0	0	0	0	0	0	0	0	0	0	0	0	0	0	0	0	0	0	0
2-Methylundecanal	CCCCCCCCCC(C)C=O	1	1	0	0	0	0	0	0	0	0	1	0	0	0	0	0	0	0	0	0	0	0	0	0	1	0	0	0	0	1	0	0	0	0	0	0	0	0	0	0	0	0	0	0	0	0	0	0
2-Nitro-p- phenylenediamine	Nc1ccc(N)c(c1)N(=O)=O	1	1	0	0	0	0	0	0	0	0	0	0	0	0	0	1	1	0	0	0	0	0	0	0	0	0	0	0	0	0	0	0	0	0	0	0	0	0	0	0	0	0	0	0	0	0	0	0
6-Methoxy-4-methyl-8-quinolinamine	COc1cc(N)c2nccc(C)c2c1	0	0	0	0	0	0	0	0	0	0	0	0	0	0	0	1	1	0	0	0	0	0	0	0	0	0	0	0	0	0	0	0	0	0	0	0	0	0	0	0	0	0	0	0	0	0	0	0
3, 3', 4', 5-Tetrachloro-salicylanilide	Oc1c(Cl)cc(Cl)cc1C(=O)Nc1ccc(Cl)c(Cl)c1	1	0	0	0	0	0	0	0	0	0	0	0	1	0	0	1	1	0	0	0	0	0	0	0	0	0	0	0	0	0	0	0	0	0	0	0	0	0	0	0	0	0	0	0	1	0	0	0
3,4-Dichloroaniline hydrochloride	Nc1ccc(Cl)c(Cl)c1	1	0	0	0	0	0	0	0	0	0	0	0	0	0	0	1	1	0	0	0	0	0	0	0	0	0	0	0	0	0	0	0	0	0	0	0	0	0	0	0	0	0	0	0	0	0	0	0
3,4-Dihydrocoumarin	O=C1CCc2ccccc2O1	1		0	0	0	0	0	0	0	0	0	0	1	0	0	0	0	0	0	0	0	0	0	0	0	0	0	0	0	0	0	0	0	0	0	0	0	0	0	0	0	0	0	0	0	0	0	0
3,5,5-Trimethyl- hexanoyl chloride	CC(CC(Cl)=O)CC(C)(C)C	1	1	0	0	0	0	0	0	0	0	0	0	0	0	0	0	0	0	0	0	0	0	0	0	0	0	0	0	0	0	0	0	0	0	0	0	0	0	0	0	0	0	0	0	0	0	0	0
Anthranilic acid	Nc1ccccc1C(O)=O	0		0	0	0	0	0	0	0	0	0	0	0	0	0	1	1	0	0	0	0	0	0	0	0	0	0	0	0	0	0	0	0	0	0	0	0	0	0	0	0	0	0	0	0	0	0	0
Benzocaine	CCOC(=O)c1ccc(N)cc1	0	0	0	0	0	0	0	0	0	0	0	0	0	0	0	1	1	0	0	0	0	0	0	0	0	0	0	0	0	0	0	0	0	0	0	0	0	0	0	0	0	0	0	0	0	0	0	0
Bromobutane	CCCCBr	0	1	0	0	0	0	0	0	0	0	0	0	0	0	0	0	0	0	0	0	0	0	0	0	0	0	0	1	1	0	0	0	0	0	0	0	0	0	0	0	0	0	0	0	0	0	0	0
3-Aminomethyl- 3,5,5-trimethylcyclohexyl amine	CC1(C)CC(N)CC(C)(CN)C1	1	1	0	0	0	0	0	0	0	0	0	0	0	0	0	0	0	0	0	0	0	0	0	0	0	1	0	0	0	0	0	0	0	0	0	0	0	0	0	0	0	0	0	0	0	0	0	0
3-Aminophenol	Nc1cccc(O)c1	1	1	0	0	0	0	0	0	0	0	0	0	0	0	0	1	1	0	0	0	0	0	0	0	0	0	0	0	0	0	0	0	0	0	0	0	0	0	0	0	0	0	0	0	0	0	0	0
3-Bromomethyl-5, 5'-dimethyl- dihydro-2(3H)-furanone	CC1(C)CC(CBr)C(=O)O1	1		0	0	0	0	0	0	0	0	0	0	0	0	0	0	0	0	0	0	0	0	0	0	0	0	0	1	0	0	0	0	0	0	0	0	0	0	0	0	0	0	0	0	0	0	0	0
3-Chloro-4-fluorobenzoylchloride	Fc1ccc(cc1Cl)C(Cl)=O	1		0	0	0	0	0	0	0	0	0	0	0	0	0	0	0	0	0	0	0	0	0	0	0	0	0	0	0	0	0	0	0	0	0	0	0	0	0	0	0	0	0	0	0	0	0	0
3-Dimethylamino- propylamine	CN(C)CCCN	1		0	0	0	0	0	0	0	0	0	0	0	0	0	0	0	0	0	0	0	0	0	0	0	1	0	0	0	0	0	0	0	0	0	0	0	0	0	0	0	0	0	0	0	0	0	0
3-Ethoxy-1-(2',3',4',5'-tetramethylphenyl)propane-1,3-dione	CCOC(=O)CC(=O)c1cc(C)c(C)c(C)c1C	1	0	0	1	0	0	0	0	0	0	0	0	0	0	0	0	0	0	0	0	0	0	0	0	0	0	0	0	0	0	0	0	0	0	0	0	0	0	1	0	0	0	0	0	0	0	0	0
3-Fluoro-5-(3-pyridinyl)benzen-amine	Nc1cc(F)cc(c1)-c1cccnc1	1		0	0	0	0	0	0	0	0	0	0	0	0	0	1	1	0	0	0	0	0	0	0	0	0	0	0	0	0	0	0	0	0	0	0	0	0	0	0	0	0	0	0	0	0	0	0
Bromononane	CCCCCCCCCBr	0	1	0	0	0	0	0	0	0	0	0	0	0	0	0	0	0	0	0	0	0	0	0	0	0	0	0	1	1	0	0	0	0	0	0	0	0	0	0	0	0	0	0	0	0	0	0	0
Chlorononane	CCCCCCCCCCl	0	1	0	0	0	0	0	0	0	0	0	0	0	0	0	0	0	0	0	0	0	0	0	0	0	0	0	1	1	0	0	0	0	0	0	0	0	0	0	0	0	0	0	0	0	0	0	0
Clarithromycin	CCC1OC(=O)C(C)C(OC2CC(C)(OC)C(O)C(C)O2)C(C)C(OC2OC(C)CC(C2O)N(C)C)C(C)(CC(C)C(=O)C(C)C(O)C1(C)O)OC	0	0	0	1	0	0	0	0	0	0	0	0	0	0	0	0	0	0	0	0	0	0	0	0	1	0	0	0	0	0	0	0	0	0	0	0	0	0	0	0	0	0	0	0	0	0	0	0
Cytosine	NC1=NC(=O)NC=C1	0		0	0	0	0	0	0	0	0	0	0	0	0	0	1	1	0	0	0	0	0	0	0	0	0	0	0	0	0	0	0	0	0	0	0	0	0	0	0	0	0	0	0	0	0	0	0
3-Methyl-4-phenyl-1,2,5-thiadiazole-1,1-dioxide	C=C1NS(=O)(=O)N=C1c1ccccc1	1		0	0	0	0	0	0	0	0	0	0	0	0	0	0	0	0	0	0	0	0	0	0	0	0	0	0	0	0	0	0	0	0	0	0	0	0	0	0	0	0	0	0	0	0	0	0
3-Methyleugenol	COc1c(C)cc(CC=C)cc1O	1	1	0	0	0	0	0	0	1	0	0	0	0	0	0	0	0	1	1	0	0	0	0	0	0	0	0	0	0	0	1	1	0	1	0	0	0	0	0	0	0	0	0	0	0	0	0	0
3-Methylisoeugenol	COc1c(C)c(C=CC)ccc1O	1	1	0	0	0	0	1	0	1	0	0	0	0	0	0	0	0	1	1	0	0	0	0	0	0	0	0	0	0	0	1	1	0	1	0	0	0	0	0	0	0	0	0	0	0	0	0	0
3-Phenylene-diamine	Nc1cccc(N)c1	1	1	0	0	0	0	0	0	0	0	0	0	0	0	0	1	1	0	0	0	0	0	0	0	0	0	0	0	0	0	0	0	0	0	0	0	0	0	0	0	0	0	0	0	0	0	0	0
Dimethyl 4-cyano-4-(3-cyclopentyloxy-4-methoxyphenyl)-pimelate	COC(=O)CCC(CCC(=O)OC)(C#N)c1ccc(OC)c(OC2CCCC2)c1	0		0	0	0	0	0	0	0	0	0	0	0	0	0	0	0	1	1	0	0	0	0	0	0	0	0	0	0	0	0	0	0	0	0	0	0	0	0	0	0	0	0	0	0	0	0	0
3-Propylidene phthalide	CCC=C1OC(=O)c2ccccc12	1		0	0	0	0	0	0	0	0	0	0	0	1	0	0	0	0	0	0	0	0	0	1	0	0	0	0	0	0	0	0	0	0	0	0	0	0	0	0	0	0	0	0	0	0	0	0
4-(Bromomethyl)- benzoic acid ethyl ester	CCOC(=O)c1ccc(CBr)cc1	1		0	0	0	0	0	0	0	0	0	0	0	0	0	0	0	0	0	0	0	0	0	0	0	0	0	1	1	0	0	0	0	0	0	0	0	0	0	0	0	0	0	0	0	0	0	0
4-(N-Ethyl-N-2- methan-sulfamido- ethyl)-2-methyl- 1,4,-phenylene-diamine	CCN(CCNS(C)(=O)=O)c1ccc(N)c(C)c1	1		0	0	0	0	0	0	0	0	0	0	0	0	0	1	1	0	0	0	0	0	0	0	0	0	0	0	0	0	0	0	0	0	0	0	0	0	0	0	0	0	0	0	0	0	0	0
4(or3)-(4-hydroxy-4-methylphenyl)-3-cyclohexen-1-carboxyaldehyde	CC(C)(O)CCCC1=CCC(CC1)C=O	1	1	0	0	0	0	0	0	0	0	1	0	0	0	0	0	0	0	0	0	0	0	0	0	1	0	0	0	0	1	0	0	0	0	0	0	0	0	0	0	0	0	0	0	0	0	0	0
Ethyl (Z)-a-[[2-(tert-butoxy)-1,1-dimethyl-2-oxoethoxy]imino]-2-(tritylamino)thiazol-4-acetate	CCOC(=O)C(=NOC(C)(C)C(=O)OC(C)(C)C)c1csc(NC(c2ccccc2)(c2ccccc2)c2ccccc2)n1	0	0	0	0	0	0	0	0	0	0	0	0	0	0	0	1	1	0	0	0	0	0	0	0	0	0	0	0	0	0	0	0	0	0	0	0	0	0	0	0	0	0	0	0	0	0	0	0
4,4,4-Trifluoro-1- phenylbutane-1,3- dione	FC(F)(F)C(=O)CC(=O)c1ccccc1	1		0	0	0	0	0	0	0	0	0	0	0	0	0	0	0	0	0	0	0	0	0	0	0	0	0	0	0	0	0	0	0	0	0	0	0	0	0	0	0	0	0	0	0	0	0	0
4,4-Dibromobenzil	BrC1(Br)CC=C(C=C1)C(=O)C(=O)c1ccccc1	1		0	0	0	1	0	0	0	0	0	0	0	0	0	0	0	0	0	0	0	0	0	0	0	0	0	1	0	0	0	0	0	0	0	0	0	0	0	0	0	1	0	0	0	0	0	0
Ethyl benzoylacetate	CCOC(=O)CC(=O)c1ccccc1	0		0	1	0	0	0	0	0	0	0	0	0	0	0	0	0	0	0	0	0	0	0	0	0	0	0	0	0	0	0	0	0	0	0	0	0	0	1	0	0	0	0	0	0	0	0	0
4-Allylanisole	COc1ccc(CC=C)cc1	1	1	0	0	0	0	0	0	0	0	0	0	0	0	0	0	0	0	0	0	0	0	0	0	0	0	0	0	0	0	0	0	0	0	0	0	0	0	0	0	0	0	0	0	0	0	0	0
4-Amino-3- nitrophenyl thiocyanate	Nc1ccc(SC#N)cc1N(=O)=O	1		0	0	0	0	0	0	0	0	0	0	0	0	0	1	1	0	0	0	0	0	0	0	0	0	0	0	0	0	0	0	0	0	0	0	0	0	0	0	0	0	0	0	0	0	0	0
4-Bromo-1- phthalimidopentane	CC(Br)CCCN1C(=O)c2ccccc2C1=O	1	0	0	0	0	0	0	0	0	0	0	0	0	0	0	0	0	0	0	0	0	0	1	1	0	0	0	1	0	0	0	0	0	0	0	0	0	0	0	0	0	0	0	0	0	0	0	0
4-Chloro-6- iodoquinazoline	Clc1ncnc2ccc(I)cc12	1		0	0	0	0	0	0	0	0	0	0	0	0	0	0	0	0	0	0	0	0	0	0	0	0	0	0	0	0	0	0	0	0	0	0	0	0	0	0	0	0	0	0	0	0	0	0
Furil	O=C(C(=O)c1ccco1)c1ccco1	0		0	0	0	0	0	0	0	0	0	0	0	0	0	0	0	0	0	0	0	0	0	0	0	0	0	0	0	0	0	0	0	0	0	0	0	0	0	0	1	1	0	0	0	0	0	0
Kanamycin	NCC1OC(OC2C(N)CC(N)C(OC3OC(CO)C(O)C(N)C3O)C2O)C(O)C(O)C1O	0	0	0	0	0	0	0	0	0	0	0	0	0	0	0	0	0	0	0	0	0	0	0	0	1	1	0	0	0	0	0	0	0	0	0	0	0	0	0	0	0	0	0	0	0	0	0	0
Sulfanilamide	Nc1ccc(cc1)S(N)(=O)=O	0	0	0	0	0	0	0	0	0	0	0	0	0	0	0	1	1	0	0	0	0	0	0	0	0	0	0	0	0	0	0	0	0	0	0	0	0	0	0	0	0	0	0	0	0	0	0	0
4-Iodo-1-phthalimido-pentane	CC(I)CCCN1C(=O)c2ccccc2C1=O	1		0	0	0	0	0	0	0	0	0	0	0	0	0	0	0	0	0	0	0	0	1	1	0	0	0	1	0	0	0	0	0	0	0	0	0	0	0	0	0	0	0	0	0	0	0	0
Sulfanilic acid	Nc1ccc(cc1)S(O)(=O)=O	0	0	0	0	0	0	0	0	0	0	0	0	0	0	0	1	1	0	0	0	0	0	0	0	0	0	0	0	0	0	0	0	0	0	0	0	0	0	0	0	0	0	0	0	0	0	0	0
4-isopropenyl-1-methyl-6-methylene-cyclohexene	CC(=C)C1CC=C(C)C(=C)C1	1		0	0	0	0	0	0	0	0	0	0	0	0	0	0	0	0	0	0	0	0	0	0	0	0	0	0	0	0	0	0	0	0	0	0	0	0	0	0	0	0	0	0	0	0	0	0
tert-Butyl 3-Aminobenzoate	CC(C)(C)OC(=O)c1cccc(N)c1	0	0	0	0	0	0	0	0	0	0	0	0	0	0	0	1	1	0	0	0	0	0	0	0	0	0	0	0	0	0	0	0	0	0	0	0	0	0	0	0	0	0	0	0	0	0	0	0
(2-oxo-1-phenylpyrrolidin-3-yl)-Triphenylphosphanium	O=C1C(CCN1c1ccccc1)P(c1ccccc1)(c1ccccc1)c1ccccc1	0		0	0	0	0	0	0	0	0	0	0	1	0	0	0	0	0	0	0	0	0	0	0	0	0	0	0	0	0	0	0	0	0	0	0	0	0	0	0	0	0	0	0	0	0	0	0
4-Methylamino- phenol sulfate	CNc1ccc(O)cc1	1	1	0	0	0	0	0	0	0	0	0	0	0	0	0	1	1	0	0	0	0	0	0	0	0	0	0	0	0	0	0	0	0	0	0	0	0	0	0	0	0	0	0	0	0	0	0	0
4-Nitrobenzyl bromide	BrCc1ccc(cc1)N(=O)=O	1		0	0	0	0	0	0	0	0	0	0	0	0	0	0	0	0	0	0	0	0	0	0	0	0	0	1	1	0	0	0	0	0	0	0	0	0	0	0	0	0	0	0	0	0	0	0
4-Phenylene-diamine	Nc1ccc(N)cc1	1		0	0	0	0	0	0	0	0	0	0	0	0	0	1	1	0	0	0	0	0	0	0	0	0	0	0	0	0	0	0	0	0	0	0	0	0	0	0	0	0	0	0	0	0	0	0
4-Sulfophenyl-6-((1-oxononyl)amino)hexanoate (Nonanoylamidocaproylacidoxybenzenesulfonate)	CCCCCCCCC(=O)NCCC(CCC(O)=O)c1ccccc1S(O)(=O)=O	1		0	0	0	0	0	0	0	0	0	0	0	0	0	0	0	0	0	0	0	0	0	0	0	0	0	0	0	0	0	0	0	0	0	0	0	0	0	0	0	0	0	0	0	0	0	0
1-(4-Ethoxyphenyl)-2-[4-(methylsulfonyl)phenyl]ethanone	CCOc1ccc(cc1)C(=O)Cc1ccc(cc1)S(C)(=O)=O	0	0	0	1	0	0	0	0	0	0	0	0	0	0	0	0	0	0	0	0	0	0	0	0	0	0	0	0	0	0	0	0	0	0	0	0	0	0	0	0	0	0	0	0	0	0	0	0
5-(prop-1-en-1-yl)-2-(propan-2-yloxy)phenol	COc1cc(C=CC)ccc1OC(C)C	1		0	0	0	0	1	0	0	0	0	0	0	0	0	0	0	1	1	0	0	0	0	0	0	0	0	0	0	0	0	0	0	0	0	0	0	0	0	0	0	0	0	0	0	0	0	0
5,5-Dimethyl-3-methylenedihydro-2(3H)-furanone	CC1(C)CC(=C)C(=O)O1	1	1	0	0	0	0	0	0	0	0	0	1	0	0	0	0	0	0	0	0	0	0	0	0	0	0	1	0	0	0	0	0	0	0	0	0	0	0	0	0	0	0	0	0	0	0	0	0
1-(tert-Butoxycarbonyl)-4-fluoro-L-prolinamide	CC(C)(C)OC(=O)N1CC(F)CC1C(N)=O	0	0	0	0	0	0	0	1	0	0	0	0	0	0	0	0	0	0	0	0	0	0	0	0	0	0	0	0	0	0	0	0	0	0	0	0	0	0	0	0	0	0	0	0	0	0	0	0
5-Amino-O-Cresol	Cc1ccc(N)cc1O	1		0	0	0	0	0	0	0	0	0	0	0	0	0	1	1	0	0	0	0	0	0	0	0	0	0	0	0	0	0	0	0	0	0	0	0	0	0	0	0	0	0	0	0	0	0	0
5'-Chloro-2'- hydroxy-3'-nitro- [1,1'-biphenyl]-3- carboxylic acid	OC(=O)c1cccc(c1)-c1cc(Cl)cc(c1O)N(=O)=O	1	0	0	0	0	0	0	0	0	0	0	0	0	0	0	0	0	0	0	0	0	0	0	0	0	0	0	0	0	0	0	0	0	0	0	0	0	0	0	0	0	0	0	0	0	0	0	0
5-Chloro-2,6- dimethoxy-4- methyl-8- nitroquinoline	COc1cc(C)c2c(Cl)c(OC)cc(c2n1)N(=O)=O	1	0	0	0	0	0	0	0	0	0	0	0	0	0	0	0	0	0	0	0	0	0	0	0	0	0	0	0	0	0	0	0	0	0	0	0	0	0	0	0	0	0	0	0	0	0	0	0
1-(tert-Butoxycarbonyl)-4-fluoro-L-proline	CC(C)(C)OC(=O)N1CC(F)CC1C(O)=O	0	0	0	0	0	0	0	1	0	0	0	0	0	0	0	0	0	0	0	0	0	0	0	0	0	0	0	0	0	0	0	0	0	0	0	0	0	0	0	0	0	0	0	0	0	0	0	0
5-Chloro-2-methyl- 4-isothiazolin-3-one	CN1SC(Cl)=CC1=O	1		0	0	0	0	0	0	0	0	0	0	0	0	0	0	0	0	0	0	0	0	0	0	0	0	0	0	0	0	0	0	0	0	0	0	0	0	0	0	0	0	0	0	0	0	0	0
5-Chloro-6-methoxy-4-methyl-8-nitro-2(1h)quinolinone	COc1cc(c2NC(=O)C=C(C)c2c1Cl)N(=O)=O	1		0	0	0	0	0	0	0	0	0	0	0	0	0	0	0	0	0	0	0	0	0	0	0	0	0	0	0	0	0	0	0	0	0	0	0	0	0	0	0	0	0	0	0	0	0	0
1,1-Dimethylethyl[1-[bis(4-fluorophenyl)-methyl]-2-[2-cyano-4-fluoro-1-pyrrolidinyl]-2-oxoethyl]carbamate	CC(C)(C)OC(=O)NC(C(c1ccc(F)cc1)c1ccc(F)cc1)C(=O)N1CC(F)CC1C#N	0	0	0	0	0	0	0	1	0	0	0	0	0	0	0	0	0	0	0	0	0	0	0	0	0	0	0	0	0	0	0	0	0	0	0	0	0	0	0	0	0	0	0	0	0	0	0	0
5-Methoxy-6-trifluoromethyl-2,3-dihydro-1H-indole	COc1cc2CCNc2cc1C(F)(F)F	1	0	0	0	0	0	0	0	0	0	0	0	0	0	0	1	1	0	0	0	0	0	0	0	0	0	0	0	0	0	0	0	0	0	0	0	0	0	0	0	0	0	0	0	0	0	0	0
5-Methyl-2,3-hexanedione	CC(C)CC(=O)C(C)=O	1		0	0	0	1	0	0	0	0	0	1	0	1	0	0	0	0	0	0	0	0	0	0	0	0	0	0	0	0	0	0	0	0	0	0	0	0	0	0	0	0	0	0	0	0	0	0
5-Methyl-2-phenyl-2-hexenal	CC(C)CC=C(C=O)c1ccccc1	1	1	1	0	0	0	0	0	0	0	1	1	0	0	0	0	0	0	0	0	0	0	0	0	0	0	0	0	0	0	0	0	0	0	0	0	0	0	0	0	0	0	0	0	0	0	0	0
1,5-Dimethyl-4-phenyl-2-imidazolidinone	CC1C(NC(=O)N1C)c1ccccc1	0		0	0	0	0	0	1	0	0	0	0	0	0	0	0	0	0	0	0	0	0	0	0	0	0	0	0	0	0	0	0	0	0	0	0	0	0	0	0	0	0	0	0	0	0	0	0
5-Methyleugenol	COc1cc(CC=C)c(C)cc1O	1	1	0	0	0	0	0	0	0	0	0	0	0	0	0	0	0	1	1	0	0	0	0	0	0	0	0	0	0	0	1	1	0	1	0	0	0	0	0	0	0	0	1	0	0	0	0	0
6-(Diethylamino)- 1 -hexanol	CCN(CC)CCCCCCO	1	1	0	0	0	0	0	0	0	0	0	0	0	0	0	0	0	0	0	0	0	0	0	0	0	0	0	0	0	0	0	0	0	0	0	0	0	0	0	0	0	0	0	0	0	0	0	0
6(E)-Nonenal	CCC=CCCCCC=O	1	1	0	0	0	0	0	0	0	0	1	0	0	0	0	0	0	0	0	0	0	0	0	0	1	0	0	0	0	1	0	0	0	0	0	0	0	0	0	0	0	0	0	0	0	0	0	0
6-[(2-Methyl-3-pyridinyl)oxy]-3-pyridinamine	Cc1ncccc1Oc1ccc(N)cn1	1		0	0	0	0	0	0	0	0	0	0	0	0	0	1	1	0	0	0	0	0	0	0	0	0	0	0	0	0	0	0	0	0	0	0	0	0	0	0	0	0	0	0	0	0	0	0
1-[2-Amino-3,3-bis(4-fluorophenyl)-1-oxopropyl]-4-fluoro-2-pyrrolidine carbonitrile	NC(C(c1ccc(F)cc1)c1ccc(F)cc1)C(=O)N1CC(F)CC1C#N	0	0	0	0	0	0	0	1	0	0	0	0	0	0	0	0	0	0	0	0	0	0	0	0	0	0	0	0	0	0	0	0	0	0	0	0	0	0	0	0	0	0	0	0	0	0	0	0
6-Diethylaminohexyl bromide hydrobromide	CCN(CC)CCCCCCBr	1	1	0	0	0	0	0	0	0	0	0	0	0	0	0	0	0	0	0	0	0	0	0	0	0	0	0	1	1	0	0	0	0	0	0	0	0	0	0	0	0	0	0	0	0	0	0	0
1-[5-[(4-Fluorophenyl)methyl]-2-furanyl]ethanone	CC(=O)c1ccc(Cc2ccc(F)cc2)o1	0		0	1	0	0	0	0	0	0	0	0	0	0	0	0	0	0	0	0	0	0	0	0	0	0	0	0	0	0	0	0	0	0	0	0	0	0	0	0	0	0	0	0	0	0	0	0
2,3,4,5-Tetrahydro-N-(1-methylethyl)-2,4-dioxo-N,5-diphenyl-3-[(phenylmethoxy)-imino]-1H-1,5-benzodiazepine-1-acetamide	CC(C)N(C(=O)CN1c2ccccc2N(c2ccccc2)C(=O)C(=NOCc2ccccc2)C1=O)c1ccccc1	0	0	0	0	0	0	0	0	0	0	0	0	1	0	0	0	0	0	0	0	0	0	0	0	0	0	0	0	0	0	0	0	0	0	0	0	0	0	0	0	0	0	0	0	0	0	0	0
2-Aminoethyl methyl sulfone	CS(=O)(=O)CCN	0		0	0	0	0	0	0	0	0	0	0	0	0	0	0	0	0	0	0	0	0	0	0	0	1	0	0	0	0	0	0	0	0	0	0	0	0	0	0	0	0	0	0	0	0	0	0
3-(2,3-Dihydro-1H-inden-2-yl)-1-[1-(2-methyl-1,3-oxazol-4-yl)-2-(4-morpholinyl)-2-oxoethyl]-6-[1-methylpropyl]-2,5-piperazinedione	CCC(C)C1N(C(C(=O)N2CCOCC2)c2coc(C)n2)C(=O)C(NC1=O)C1Cc2ccccc2C1	0	0	0	0	0	0	0	1	0	0	0	0	0	0	0	0	0	0	0	0	0	0	0	0	0	0	0	0	0	0	0	0	0	0	0	0	0	0	0	0	0	0	0	0	0	0	0	0
3-Hydroxy-2,4,7,14-tetramethyl-9-oxo-4-vinyltricyclo[5.4.3.01,8]tetradec-6-yl [(8-methyl-8-azabicyclo[3.2.1]oct-3-yl)sulfanyl]acetate	CC1CCC23CCC(=O)C2C1(C)C(CC(C)(C=C)C(O)C3C)OC(=O)CSC1CC2CCC(C1)N2C	0	0	0	1	0	0	0	0	0	0	0	0	0	0	0	0	0	0	0	0	0	0	0	0	0	0	0	0	0	0	0	0	0	0	0	0	0	0	0	0	0	0	0	0	0	0	0	0
6-Methyleugenol	COc1cc(CC=C)cc(C)c1O	1	1	0	0	0	0	0	0	1	0	0	0	0	0	0	0	0	1	1	0	0	0	0	0	0	0	0	0	0	0	1	1	0	1	0	0	0	0	0	0	0	0	1	0	0	0	0	0
6-Methylisoeugenol	COc1cc(C=CC)cc(C)c1O	1	1	0	0	0	0	1	0	1	0	0	0	0	0	0	0	0	1	1	0	0	0	0	0	0	0	0	0	0	0	1	1	0	1	0	0	0	0	0	0	0	0	0	0	0	0	0	0
7,12-Dimethyl-benz[a]anthracene	Cc1c2ccccc2c(C)c2c1ccc1ccccc21	1		0	0	0	0	0	0	0	0	0	0	0	0	0	0	0	0	0	0	0	0	0	0	0	0	0	0	0	0	0	0	0	0	0	0	0	0	0	0	0	0	0	0	0	0	0	0
7-[(4z)-3-(Aminomethyl)-4-(methoxyimino)-1 -pyrrolidinyl]-1-cyclopropyl-6-fluoro-1,4-dihydro-4-oxo-1,8-naphthyridine-3 -carboxylic acid,monomethane-sulfonate	CON=C1CN(CC1CN)c1nc2N(C=C(C(O)=O)C(=O)c2cc1F)C1CC1	1	0	0	0	0	0	0	0	0	0	0	0	0	0	0	0	0	0	0	0	0	0	0	0	0	0	0	0	0	0	0	0	0	0	0	0	0	0	0	0	0	0	0	0	0	0	0	0
7-Bromotetradecane	CCCCCCCC(Br)CCCCCC	1	1	0	0	0	0	0	0	0	0	0	0	0	0	0	0	0	0	0	0	0	0	0	0	0	0	0	1	0	0	0	0	0	0	0	0	0	0	0	0	0	0	0	0	0	0	0	0
8-Chloro-3-pentyl-3,7-dihydro-1h-purine-2,6-dione	CCCCCN1c2nc(Cl)[nH]c2C(=O)NC1=O	1	0	0	0	0	0	0	0	0	0	0	0	0	0	0	0	0	0	0	0	0	0	0	0	0	0	0	0	0	0	0	0	0	0	0	0	0	0	0	0	0	0	0	0	0	0	0	0
4-[4-({1-Butyl-3-[cyclohexyl(hydroxy)methyl]-2,5-dioxo-1,4,9-triazaspiro[5.5]undec-9-yl}methyl)phenoxy]benzoic acid	CCCCN1C(=O)C(NC(=O)C11CCN(Cc2ccc(Oc3ccc(cc3)C(O)=O)cc2)CC1)C(O)C1CCCCC1	0	0	0	0	0	0	0	1	0	0	0	0	0	0	0	0	0	0	0	0	0	0	0	0	0	0	0	0	0	0	0	0	0	0	0	0	0	0	0	0	0	0	0	0	0	0	0	0
a-Amyl cinnamic aldehyde	CCCCCC(C=O)=Cc1ccccc1	1	1	1	0	0	0	0	0	0	0	1	1	0	0	1	0	0	0	0	0	0	0	0	0	0	0	0	0	0	0	0	0	0	0	0	0	0	0	0	0	0	0	0	0	0	0	0	0
Abietic acid	CC(C)C1=CC2=CCC3C(C)(CCCC3(C)C(O)=O)C2CC1	1		0	0	0	0	0	0	0	0	0	0	0	0	0	0	0	0	0	0	0	0	0	0	0	0	0	0	0	0	0	0	0	0	0	0	0	0	0	0	0	0	0	0	0	0	0	0
a-Butyl cinnamic aldehyde	CCCCC(C=O)=Cc1ccccc1	1	1	1	0	0	0	0	0	0	0	1	1	0	0	1	0	0	0	0	0	0	0	0	0	0	0	0	0	0	0	0	0	0	0	0	0	0	0	0	0	0	0	0	0	0	0	0	0
4'-Methoxyacetophenone	COc1ccc(cc1)C(C)=O	0		0	1	0	0	0	0	0	0	0	0	0	0	0	0	0	0	0	0	0	0	0	0	0	0	0	0	0	0	0	0	0	0	0	0	0	0	0	0	0	0	0	0	0	0	0	0
a-Hexyl cinnamic aldehyde	CCCCCCC(C=O)=Cc1ccccc1	1	1	1	0	0	0	0	0	0	0	1	1	0	0	1	0	0	0	0	0	0	0	0	0	0	0	0	0	0	0	0	0	0	0	0	0	0	0	0	0	0	0	0	0	0	0	0	0
alpha-Methyl cinnamic aldehyde	CC(C=O)=Cc1ccccc1	1	1	1	0	0	0	0	0	0	0	1	1	0	0	1	0	0	0	0	0	0	0	0	0	0	0	0	0	0	0	0	0	0	0	0	0	0	0	0	0	0	0	0	0	0	0	0	0
a-Methyl phenylacetaldehyde	CC(C=O)c1ccccc1	1	1	0	0	0	0	0	0	0	0	1	0	0	0	0	0	0	0	0	0	0	0	0	0	1	0	0	0	0	1	0	0	0	0	0	0	0	0	0	0	0	0	0	0	0	0	0	0
Aniline	Nc1ccccc1	1		0	0	0	0	0	0	0	0	0	0	0	0	0	1	1	0	0	0	0	0	0	0	0	0	0	0	0	0	0	0	0	0	0	0	0	0	0	0	0	0	0	0	0	0	0	0
6-Ethenyldeca-hydro-5-hydroxy-4,6,9,10-tetramethyl-1-oxo-3a,9-propano-3ah-cyclopentacyclo-octen-8-yl [[(3-exo)-8-methyl-8-azabicyclo-[3.2.1]oct-3-yl]thio]-acetate	CC1CCC23CCC(=O)C2C1(C)C(CC(C)(C=C)C(O)C3C)OC(=O)CO	0	0	0	1	0	0	0	0	0	0	0	0	0	0	0	0	0	0	0	0	0	0	0	0	0	0	0	0	0	0	0	0	0	0	0	0	0	0	0	0	0	0	0	0	0	0	0	0
a-Phellandrenea	CC(C)C1CC=C(C)C=C1	1	1	0	0	0	0	0	0	0	0	0	0	0	0	0	0	0	0	0	0	0	0	0	0	0	0	0	0	0	0	0	0	0	0	0	0	0	0	0	0	0	0	0	0	0	0	0	0
a-Terpinene	CC(C)C1=CC=C(C)CC1	1		0	0	0	0	0	0	0	0	0	0	0	0	0	0	0	0	0	0	0	0	0	0	0	0	0	0	0	0	0	0	0	0	0	0	0	0	0	0	0	0	0	0	0	0	0	0
Fumaric acid	OC(=O)C=CC(O)=O	0		0	0	0	0	1	0	0	0	0	0	0	0	0	0	0	0	0	0	0	0	0	0	0	0	0	0	0	0	0	0	0	0	0	0	0	0	0	0	0	0	0	0	0	0	0	0
Azithromycin	CCC1OC(=O)C(C)C(OC2CC(C)(OC)C(O)C(C)O2)C(C)C(OC2OC(C)CC(C2O)N(C)C)C(C)(O)CC(C)CN(C)C(C)C(O)C1(C)O	1	0	0	0	0	0	0	0	0	0	0	0	0	0	0	0	0	0	0	0	0	0	0	0	1	0	0	0	0	0	0	0	0	0	0	0	0	0	0	0	0	0	0	0	0	0	0	0
Bandrowski's base	Nc1ccc(cc1)N=C1CC(=N)C(CC1=N)=Nc1ccc(N)cc1	1	0	0	0	0	0	0	0	0	0	0	0	0	0	0	1	1	0	0	0	0	0	0	0	0	0	0	0	0	0	0	0	0	0	0	0	0	0	0	0	0	0	0	0	0	0	0	0
Iodohexane	CCCCCCI	0	1	0	0	0	0	0	0	0	0	0	0	0	0	0	0	0	0	0	0	0	0	0	0	0	0	0	1	0	0	0	0	0	0	0	0	0	0	0	0	0	0	0	0	0	0	0	0
Benzalkonium chloride	CCCCCCCCCCCCCC[N+](C)(C)Cc1ccccc1	1	1	0	0	0	0	0	0	0	0	0	0	0	0	0	0	0	0	0	0	0	0	0	0	0	0	0	0	0	0	0	0	0	0	0	0	0	0	0	0	0	0	0	0	0	0	0	0
Benzene-1,3,4-tricarboxylic anhydride	OC(=O)c1ccc2C(=O)OC(=O)c2c1	1	0	0	0	0	0	0	0	0	0	0	0	0	0	0	0	0	0	0	0	0	0	1	1	0	0	0	0	0	0	0	0	0	0	0	0	0	0	0	0	0	0	0	0	0	0	0	0
Benzo[a]pyrene	c1ccc2c(c1)cc1ccc3cccc4ccc2c1c34	1		0	0	0	0	0	0	0	0	0	0	0	0	0	0	0	0	0	0	0	0	0	0	0	0	0	0	0	0	0	0	0	0	0	0	0	0	0	0	0	0	0	0	0	0	0	0
Iodooctadecane	CCCCCCCCCCCCCCCCCCI	0	1	0	0	0	0	0	0	0	0	0	0	0	0	0	0	0	0	0	0	0	0	0	0	0	0	0	1	0	0	0	0	0	0	0	0	0	0	0	0	0	0	0	0	0	0	0	0
Benzoquinone	O=C1C=CC(=O)C=C1	1	1	0	0	0	1	1	0	0	0	0	0	0	0	0	0	0	0	0	0	0	0	0	0	0	0	0	0	0	0	0	0	0	0	0	0	0	0	0	0	0	0	0	0	0	0	0	0
Benzyl benzoate	O=C(OCc1ccccc1)c1ccccc1	1	1	0	0	0	0	0	1	0	0	0	0	0	0	0	0	0	0	0	0	0	0	0	0	0	0	0	0	0	0	0	0	0	0	0	0	0	0	0	0	0	0	0	0	0	0	0	0
Benzyl Bromide	BrCc1ccccc1	1	0	0	0	0	0	0	0	0	0	0	0	0	0	0	0	0	0	0	0	0	0	0	0	0	0	0	1	1	0	0	0	0	0	0	0	0	0	0	0	0	0	0	0	0	0	0	0
Benzylidene acetone	CC(=O)C=Cc1ccccc1	1	1	0	0	0	0	1	0	0	0	0	1	0	0	1	0	0	0	0	0	0	0	0	0	0	0	0	0	0	0	0	0	0	0	0	0	0	0	0	0	0	0	0	0	0	0	0	0
beta-Propiolactone	O=C1CCO1	1		0	0	0	0	0	0	0	0	0	0	0	0	0	0	0	0	0	0	0	0	0	0	0	0	0	0	0	0	0	0	0	0	0	0	0	0	0	0	0	0	0	0	0	0	0	0
b-Phellandrene	CC(C)C1CCC(=C)C=C1	1	0	0	0	0	0	0	0	0	0	0	0	0	0	0	0	0	0	0	0	0	0	0	0	0	0	0	0	0	0	0	0	0	0	0	0	0	0	0	0	0	0	0	0	0	0	0	0
b-Phenylcinnamaldehyde	O=CC=C(c1ccccc1)c1ccccc1	1	1	1	0	0	0	0	0	0	0	1	1	0	0	1	0	0	0	0	0	0	0	0	0	0	0	0	0	0	0	0	0	0	0	0	0	0	0	0	0	0	0	0	0	0	0	0	0
m-Chloropropiophenone	CCC(=O)c1cccc(Cl)c1	0		0	1	0	0	0	0	0	0	0	0	0	0	0	0	0	0	0	0	0	0	0	0	0	0	0	0	0	0	0	0	0	0	0	0	0	0	0	0	0	0	0	0	0	0	0	0
Bromodocosane	CCCCCCCCCCCCCCCCCCCCCCBr	1	1	0	0	0	0	0	0	0	0	0	0	0	0	0	0	0	0	0	0	0	0	0	0	0	0	0	1	1	0	0	0	0	0	0	0	0	0	0	0	0	0	0	0	0	0	0	0
Bromododecane	CCCCCCCCCCCCBr	1	1	0	0	0	0	0	0	0	0	0	0	0	0	0	0	0	0	0	0	0	0	0	0	0	0	0	1	1	0	0	0	0	0	0	0	0	0	0	0	0	0	0	0	0	0	0	0
Bromoeicosane	CCCCCCCCCCCCCCCCCCCCBr	1	1	0	0	0	0	0	0	0	0	0	0	0	0	0	0	0	0	0	0	0	0	0	0	0	0	0	1	1	0	0	0	0	0	0	0	0	0	0	0	0	0	0	0	0	0	0	0
Bromoheptadecane	CCCCCCCCCCCCCCCCCBr	1	1	0	0	0	0	0	0	0	0	0	0	0	0	0	0	0	0	0	0	0	0	0	0	0	0	0	1	1	0	0	0	0	0	0	0	0	0	0	0	0	0	0	0	0	0	0	0
Bromohexadecane	CCCCCCCCCCCCCCCCBr	1	1	0	0	0	0	0	0	0	0	0	0	0	0	0	0	0	0	0	0	0	0	0	0	0	0	0	1	1	0	0	0	0	0	0	0	0	0	0	0	0	0	0	0	0	0	0	0
Bromohexane	CCCCCCBr	1	0	0	0	0	0	0	0	0	0	0	0	0	0	0	0	0	0	0	0	0	0	0	0	0	0	0	1	1	0	0	0	0	0	0	0	0	0	0	0	0	0	0	0	0	0	0	0
N-[(1,1-Dimethylethoxy)-carbonyl]-L- tyrosine, ethyl ester	CCOC(=O)C(Cc1ccc(O)cc1)NC(=O)OC(C)(C)C	0	0	0	0	0	0	0	1	0	0	0	0	0	0	0	0	0	0	0	0	0	0	0	0	0	0	0	0	0	0	0	0	0	0	0	0	0	0	0	0	0	0	0	0	0	0	0	0
Bromooctadecane	CCCCCCCCCCCCCCCCCCBr	1	1	0	0	0	0	0	0	0	0	0	0	0	0	0	0	0	0	0	0	0	0	0	0	0	0	0	1	1	0	0	0	0	0	0	0	0	0	0	0	0	0	0	0	0	0	0	0
Bromopentadecane	CCCCCCCCCCCCCCCBr	1	1	0	0	0	0	0	0	0	0	0	0	0	0	0	0	0	0	0	0	0	0	0	0	0	0	0	1	1	0	0	0	0	0	0	0	0	0	0	0	0	0	0	0	0	0	0	0
Bromotetradecane	CCCCCCCCCCCCCCBr	1	1	0	0	0	0	0	0	0	0	0	0	0	0	0	0	0	0	0	0	0	0	0	0	0	0	0	1	1	0	0	0	0	0	0	0	0	0	0	0	0	0	0	0	0	0	0	0
Bromotridecane	CCCCCCCCCCCCCBr	1	1	0	0	0	0	0	0	0	0	0	0	0	0	0	0	0	0	0	0	0	0	0	0	0	0	0	1	1	0	0	0	0	0	0	0	0	0	0	0	0	0	0	0	0	0	0	0
Bromoundecane	CCCCCCCCCCCBr	1	1	0	0	0	0	0	0	0	0	0	0	0	0	0	0	0	0	0	0	0	0	0	0	0	0	0	1	1	0	0	0	0	0	0	0	0	0	0	0	0	0	0	0	0	0	0	0
N-{[(1,1-Dimethylethyl)oxy] carbonyl}-4-fluoro- b-(4-fluorophenyl)-L- phenylalanine	CC(C)(C)OC(=O)NC(C(c1ccc(F)cc1)c1ccc(F)cc1)C(O)=O	0	0	0	0	0	0	0	1	0	0	0	0	0	0	0	0	0	0	0	0	0	0	0	0	0	0	0	0	0	0	0	0	0	0	0	0	0	0	0	0	0	0	0	0	0	0	0	0
Butanedione	CC(=O)C(C)=O	1		0	0	0	0	0	0	0	0	0	1	0	1	0	0	0	0	0	0	0	0	0	0	0	0	1	0	0	0	0	0	0	0	0	0	0	0	0	0	0	0	0	0	0	0	0	0
Saccharine	O=C1NS(=O)(=O)c2ccccc12	0	0	0	0	0	0	0	1	0	0	0	0	0	0	0	0	0	0	0	0	0	0	0	0	0	0	0	0	0	0	0	0	0	0	0	0	0	0	0	0	0	0	0	0	0	0	0	0
Butyl acrylate	CCCCOC(=O)C=C	1	1	0	0	0	0	1	0	0	0	0	1	0	0	0	0	0	0	0	0	0	0	0	0	0	0	1	0	0	0	0	0	0	0	0	0	0	0	0	0	0	0	0	0	0	0	0	0
Butyl glycidyl ether	CCCCOCC1CO1	1		0	0	0	0	0	0	0	0	0	0	0	0	0	0	0	0	0	1	1	0	0	0	0	0	0	0	0	0	0	0	0	0	0	0	0	0	0	0	0	0	0	0	0	0	0	0
C11-azlactone	CCCCCCCCCCCC1=NC(C)(C)C(=O)O1	1	1	0	0	0	0	0	0	0	0	0	0	0	0	0	0	0	0	0	0	0	0	1	0	0	0	0	0	0	0	0	0	0	0	0	0	0	0	0	0	0	0	0	0	0	0	0	0
C15-azlactone	CCCCCCCCCCCCCCCC1=NC(C)(C)C(=O)O1	1	1	0	0	0	0	0	0	0	0	0	0	0	0	0	0	0	0	0	0	0	0	1	0	0	0	0	0	0	0	0	0	0	0	0	0	0	0	0	0	0	0	0	0	0	0	0	0
C17-azlactone	CCCCCCCCCCCCCCCCCC1=NC(C)(C)C(=O)O1	1	1	0	0	0	0	0	0	0	0	0	0	0	0	0	0	0	0	0	0	0	0	1	0	0	0	0	0	0	0	0	0	0	0	0	0	0	0	0	0	0	0	0	0	0	0	0	0
C4-azlactone	CCCCC1=NC(C)(C)C(=O)O1	1	1	0	0	0	0	0	0	0	0	0	0	0	0	0	0	0	0	0	0	0	0	1	0	0	0	0	0	0	0	0	0	0	0	0	0	0	0	0	0	0	0	0	0	0	0	0	0
C6-azlactone	CCCCCCC1=NC(C)(C)C(=O)O1	1	1	0	0	0	0	0	0	0	0	0	0	0	0	0	0	0	0	0	0	0	0	1	0	0	0	0	0	0	0	0	0	0	0	0	0	0	0	0	0	0	0	0	0	0	0	0	0
C9-azlactone	CCCCCCCCCC1=NC(C)(C)C(=O)O1	1	1	0	0	0	0	0	0	0	0	0	0	0	0	0	0	0	0	0	0	0	0	1	0	0	0	0	0	0	0	0	0	0	0	0	0	0	0	0	0	0	0	0	0	0	0	0	0
Carvoxime	CC(=C)C1CCC(C)=C(C1)N=O	1	1	0	0	0	0	0	0	0	0	0	0	0	0	0	0	0	0	0	0	0	0	0	0	0	0	0	0	0	0	0	0	0	0	0	0	0	0	0	0	0	0	0	0	0	0	0	0
(4Z)-2-Methyl-6-methylene-4-octene	CCC(=C)C=CCC(C)C	0	1	0	0	0	0	0	0	0	0	0	0	0	0	0	0	0	0	0	0	0	0	0	0	0	0	0	0	0	0	0	0	0	0	0	0	0	0	0	0	0	0	0	0	0	0	0	0
[4-(Ethoxymethyl)-2,6-dimethoxyphenyl]boronic acid	CCOCc1cc(OC)c(B(O)O)c(OC)c1	0		0	0	0	0	0	0	0	0	0	0	0	0	0	0	0	0	0	0	0	0	0	0	0	0	0	0	0	0	0	0	0	0	0	0	0	0	0	0	0	0	0	0	0	0	0	0
Chlorotetradecane	CCCCCCCCCCCCCCCl	1	1	0	0	0	0	0	0	0	0	0	0	0	0	0	0	0	0	0	0	0	0	0	0	0	0	0	1	1	0	0	0	0	0	0	0	0	0	0	0	0	0	0	0	0	0	0	0
Chlorothalonil	Clc1c(Cl)c(C#N)c(Cl)c(C#N)c1Cl	1		0	0	0	0	0	0	0	0	0	0	0	0	0	0	0	0	0	0	0	0	0	0	0	0	0	0	0	0	0	0	0	0	0	0	0	0	0	0	0	0	0	0	0	0	0	0
Cinnamic alcohol	OCC=Cc1ccccc1	1	1	0	0	0	0	1	0	0	0	0	0	0	0	0	0	0	0	0	0	0	0	0	0	0	0	0	0	0	0	0	0	0	0	0	0	0	0	0	0	0	0	0	0	0	0	0	0
Cinnamic aldehyde	O=CC=Cc1ccccc1	1	1	1	0	0	0	1	0	0	0	1	1	0	0	1	0	0	0	0	0	0	0	0	0	0	0	0	0	0	0	0	0	0	0	0	0	0	0	0	0	0	0	0	0	0	0	0	0
Citral	CC(C)=CCCC(C)=CC=O	1	1	1	0	1	0	0	0	0	0	1	1	0	0	0	0	0	0	0	0	0	0	0	0	0	0	0	0	0	0	0	0	0	0	0	0	0	0	0	0	0	0	0	0	0	0	0	0
1-(3',4',5'-Tetramethoxy-phenyl)-4,4-dimethylpentane-1,3-dione	COc1cc(cc(OC)c1OC)C(=O)CC(=O)C(C)(C)C	0		0	0	0	0	0	0	0	0	0	0	0	0	0	0	0	0	0	0	0	0	0	0	0	0	0	0	0	0	0	0	0	0	0	0	0	0	0	0	0	0	0	0	0	0	0	0
Clorohexadecane	CCCCCCCCCCCCCCCCCl	1	1	0	0	0	0	0	0	0	0	0	0	0	0	0	0	0	0	0	0	0	0	0	0	0	0	0	1	1	0	0	0	0	0	0	0	0	0	0	0	0	0	0	0	0	0	0	0
Clotrimazole	Clc1ccccc1C(c1ccccc1)(c1ccccc1)n1ccnc1	1		0	0	0	0	0	0	0	0	0	0	0	0	0	0	0	0	0	0	0	0	0	0	0	0	0	0	0	0	0	0	0	0	0	0	0	0	0	0	0	0	0	0	0	0	0	0
1,2,3,5,6,7-Hexahydro-2-thioxo-4h-cyclopentapyrimi-din-4-one	O=C1NC(=S)NC2=C1CCC2	0	0	0	0	0	0	0	0	0	0	0	0	0	0	0	0	0	0	0	0	0	0	0	0	0	0	0	0	0	0	0	0	0	0	0	0	0	0	0	0	0	0	0	0	0	0	0	0
Cyclamen aldehyde	CC(Cc1ccc(cc1)C(C)C)C=O	1	1	0	0	0	0	0	0	0	0	1	0	0	0	0	0	0	0	0	0	0	0	0	0	1	0	0	0	0	1	0	0	0	0	0	0	0	0	0	0	0	0	0	0	0	0	0	0
1-[3,5-Bis(trifluoromethyl)phenyl]-N-methylethanamine	CNC(C)c1cc(cc(c1)C(F)(F)F)C(F)(F)F	0	0	0	0	0	0	0	0	0	0	0	0	0	0	0	0	0	0	0	0	0	0	0	0	0	0	0	0	0	0	0	0	0	0	0	0	0	0	0	0	0	0	0	0	0	0	0	0
Dicyclohexylcarbod iimide	C1CCC(CC1)N=C=NC1CCCCC1	1	1	0	0	0	0	0	0	0	0	0	0	0	0	0	0	0	0	0	0	0	0	0	0	0	0	0	0	0	0	0	0	0	0	0	0	0	0	0	0	0	0	0	0	0	0	0	0
Diethyl maleate	CCOC(=O)C=CC(=O)OCC	1		0	0	0	0	1	0	0	0	0	1	0	0	0	0	0	0	0	0	0	0	0	0	0	0	0	0	0	0	0	0	0	0	0	0	0	0	0	0	0	0	0	0	0	0	0	0
1-Phenylpropylamine	CCC(N)c1ccccc1	0	1	0	0	0	0	0	0	0	0	0	0	0	0	0	0	0	0	0	0	0	0	0	0	0	0	0	0	0	0	0	0	0	0	0	0	0	0	0	0	0	0	0	0	0	0	0	0
Diethyl sulfate	CCOS(=O)(=O)OCC	1		0	0	0	0	0	0	0	0	0	0	0	0	0	0	0	0	0	0	0	0	0	0	0	0	0	0	0	0	0	0	0	0	0	0	0	0	0	0	0	0	0	0	0	0	0	0
Diethylacetaldehyde	CCC(CC)C=O	1		0	0	0	0	0	0	0	0	1	0	0	0	0	0	0	0	0	0	0	0	0	0	1	0	0	0	0	1	0	0	0	0	0	0	0	0	0	0	0	0	0	0	0	0	0	0
Diethylenetriamine	NCCNCCN	1		0	0	0	0	0	0	0	0	0	0	0	0	0	0	0	0	0	0	0	0	0	0	0	1	0	0	0	0	0	0	0	0	0	0	0	0	0	0	0	0	0	0	0	0	0	0
Diglycidyl ether of Bisphenol A	CC(C)(c1ccc(OCC2CO2)cc1)c1ccc(OCC2CO2)cc1	1		0	0	0	0	0	0	0	0	0	0	0	0	0	0	0	0	0	1	1	0	0	0	0	0	0	0	0	0	0	0	0	0	0	0	0	0	0	0	0	0	0	0	0	0	0	0
Dihydroeugenol	CCCc1ccc(O)c(OC)c1	1	1	0	0	0	0	0	0	1	0	0	0	0	0	0	0	0	1	1	0	0	0	0	0	0	0	0	0	0	0	1	1	0	1	0	0	0	0	0	0	0	0	0	0	0	0	0	0
2-(4-Ethoxyphenyl)-3-[4-(methylsulfonyl)phenyl]pyrazolo[1,5-b]pyridazine	CCOc1ccc(cc1)-c1nn2ncccc2c1-c1ccc(cc1)S(C)(=O)=O	0	0	0	0	0	0	0	0	0	0	0	0	0	0	0	0	0	0	0	0	0	0	0	0	0	0	0	0	0	0	0	0	0	0	0	0	0	0	0	0	0	0	0	0	0	0	0	0
2-(Benzyl)tert- butyl)amino)-1-(alpha,4-dihydroxy-m-tolyl)ethane	CC(C)(C)N(CC(O)c1ccc(O)c(CO)c1)Cc1ccccc1	0	0	0	0	0	0	0	0	0	0	0	0	0	0	0	0	0	0	0	0	0	0	0	0	0	0	0	0	0	0	0	0	0	0	0	0	0	0	0	0	0	0	0	0	0	0	0	0
Dimethyl Sulfate	COS(=O)(=O)OC	1		0	0	0	0	0	0	0	0	0	0	0	0	0	0	0	0	0	0	0	0	0	0	0	0	0	0	0	0	0	0	0	0	0	0	0	0	0	0	0	0	0	0	0	0	0	0
Dimethyl sulfoxide	CS(C)=O	1	0	0	0	0	0	0	0	0	0	0	0	0	0	0	0	0	0	0	0	0	0	0	0	0	0	0	0	0	0	0	0	0	0	0	0	0	0	0	0	0	0	0	0	0	0	0	0
Dinocap	CCCCCCC(C)c1cc(cc(c1OC(=O)C=CC)N(=O)=O)N(=O)=O	1	0	0	0	0	0	1	0	0	0	0	1	0	0	0	0	0	0	0	0	0	0	0	0	0	0	0	0	0	0	0	0	0	0	0	0	0	0	0	0	0	0	0	0	0	0	0	0
Dipropylene triamine	NCCCNCCCN	1		0	0	0	0	0	0	0	0	0	0	0	0	0	0	0	0	0	0	0	0	0	0	0	1	0	0	0	0	0	0	0	0	0	0	0	0	0	0	0	0	0	0	0	0	0	0
Dodecyl methanesulfonate	CCCCCCCCCCCCOS(C)(=O)=O	1	1	0	0	0	0	0	0	0	0	0	0	0	0	0	0	0	0	0	0	0	0	0	0	0	0	0	0	0	0	0	0	0	0	0	0	0	0	0	0	0	0	0	0	0	0	0	0
Endo-tropine-3- mesylate	CN1C2CCC1CC(C2)OS(C)(=O)=O	1		0	0	0	0	0	0	0	0	0	0	0	0	0	0	0	0	0	0	0	0	0	0	0	0	0	0	0	0	0	0	0	0	0	0	0	0	0	0	0	0	0	0	0	0	0	0
Ethyl (3-endo)-8- methyl-8- azabicyclo[3,2,1]- octane-3-acetate	CCOC(=O)CC1CC2CCC(C1)N2C	1	1	0	0	0	0	0	0	0	0	0	0	0	0	0	0	0	0	0	0	0	0	0	0	0	0	0	0	0	0	0	0	0	0	0	0	0	0	0	0	0	0	0	0	0	0	0	0
2-[(Benzyloxy)-imino]malonic acid	OC(=O)C(=NOCc1ccccc1)C(O)=O	0	0	0	0	0	0	0	0	0	0	0	0	0	0	0	0	0	0	0	0	0	0	0	0	0	0	0	0	0	0	0	0	0	0	0	0	0	0	0	0	0	0	0	0	0	0	0	0
2-Acetylcyclohexanone	CC(=O)C1CCCCC1=O	0	1	0	0	0	0	0	0	0	0	0	0	0	0	0	0	0	0	0	0	0	0	0	0	0	0	0	0	0	0	0	0	0	0	0	0	0	0	0	0	0	0	0	0	0	0	0	0
2-Bromo-5-propoxybenzoic acid	CCCOc1ccc(Br)c(c1)C(O)=O	0		0	0	0	0	0	0	0	0	0	0	0	0	0	0	0	0	0	0	0	0	0	0	0	0	0	0	0	0	0	0	0	0	0	0	0	0	0	0	0	0	0	0	0	0	0	0
Ethyl 4-iodobenzoate	CCOC(=O)c1ccc(I)cc1	1		0	0	0	0	0	0	0	0	0	0	0	0	0	0	0	0	0	0	0	0	0	0	0	0	0	0	0	0	0	0	0	0	0	0	0	0	0	0	0	0	0	0	0	0	0	0
Ethyl acrylate	CCOC(=O)C=C	1		0	0	0	0	1	0	0	0	0	1	0	0	0	0	0	0	0	0	0	0	0	0	0	0	1	0	0	0	0	0	0	0	0	0	0	0	0	0	0	0	0	0	0	0	0	0
2-Chloro-6-methoxy-4-methylquinoline	COc1ccc2nc(Cl)cc(C)c2c1	0	0	0	0	0	0	0	0	0	0	0	0	0	0	0	0	0	0	0	0	0	0	0	0	0	0	0	0	0	0	0	0	0	0	0	0	0	0	0	0	0	0	0	0	0	0	0	0
3-[(2R)-3-[[2-(2,3-Dihydro-1H-inden-2-yl)-1,1-dimethyl-ethyl]amino]-2-hydroxypropoxy]-4,5-difluoro-benzene propanoic acid	CC(C)(CC1Cc2ccccc2C1)NCC(O)COc1cc(CCC(O)=O)cc(F)c1F	0	0	0	0	0	0	0	0	0	0	0	0	0	0	0	0	0	0	0	0	0	0	0	0	0	0	0	0	0	0	0	0	0	0	0	0	0	0	0	0	0	0	0	0	0	0	0	0
3-Hydroxy-2-phenyl-4-quinolinecarboxylic acid	OC(=O)c1c(O)c(nc2ccccc12)-c1ccccc1	0	0	0	0	0	0	0	0	0	0	0	0	0	0	0	0	0	0	0	0	0	0	0	0	0	0	0	0	0	0	0	0	0	0	0	0	0	0	0	0	0	0	0	0	0	0	0	0
Ethylene dimethacrylate	CC(=C)C(=O)OCCOC(=O)C(C)=C	1	0	0	0	0	0	0	0	0	0	0	1	0	0	0	0	0	0	0	0	0	0	0	0	0	0	1	0	0	0	0	0	0	0	0	0	0	0	0	0	0	0	0	0	0	0	0	0
Ethylenediamine	NCCN	1	0	0	0	0	0	0	0	0	0	0	0	0	0	0	0	0	0	0	0	0	0	0	0	0	1	0	0	0	0	0	0	0	0	0	0	0	0	0	0	0	0	0	0	0	0	0	0
Eugenol	COc1cc(CC=C)ccc1O	1	1	0	0	0	0	0	0	1	0	0	0	0	0	0	0	0	1	1	0	0	0	0	0	0	0	0	0	0	0	1	1	0	1	0	0	0	0	0	0	0	0	1	0	0	0	0	0
Farnesal	CC(C)=CCCC(C)=CCCC(C)=CC=O	1	1	1	0	1	0	0	0	0	0	1	1	0	0	0	0	0	0	0	0	0	0	0	0	0	0	0	0	0	0	0	0	0	0	0	0	0	0	0	0	0	0	0	0	0	0	0	0
Fluorescein isothiocyanate	Oc1ccc2c(Oc3cc(O)ccc3C22OC(=O)c3cc(ccc23)N=C=S)c1	1	0	0	0	0	0	0	1	0	0	0	0	0	0	0	0	0	0	0	0	0	0	0	0	0	0	0	0	0	0	0	0	0	0	0	0	0	0	0	0	0	0	0	0	0	0	0	0
3-Isopropyl-6-methylcyclohexene	CC(C)C1CCC(C)C=C1	0		0	0	0	0	0	0	0	0	0	0	0	0	0	0	0	0	0	0	0	0	0	0	0	0	0	0	0	0	0	0	0	0	0	0	0	0	0	0	0	0	0	0	0	0	0	0
3-Propoxybenzoic acid	CCCOc1cccc(c1)C(O)=O	0	0	0	0	0	0	0	0	0	0	0	0	0	0	0	0	0	0	0	0	0	0	0	0	0	0	0	0	0	0	0	0	0	0	0	0	0	0	0	0	0	0	0	0	0	0	0	0
Geraniol	CC(C)=CCCC(C)=CCO	1	1	0	0	0	0	0	0	0	0	0	0	0	0	0	0	0	0	0	0	0	0	0	0	0	0	0	0	0	0	0	0	0	0	0	0	0	0	0	0	0	0	0	0	0	0	0	0
Glutaraldehyde	O=CCCCC=O	1		0	0	0	0	0	0	0	0	1	0	0	0	0	0	0	0	0	0	0	0	0	0	1	0	0	0	0	1	0	0	0	0	0	0	0	0	0	0	0	0	0	0	0	0	0	0
4-Fluoro-2-Pyrrolidine-Carboxamide	NC(=O)C1CC(F)CN1	0		0	0	0	0	0	0	0	0	0	0	0	0	0	0	0	0	0	0	0	0	0	0	0	0	0	0	0	0	0	0	0	0	0	0	0	0	0	0	0	0	0	0	0	0	0	0
Glyceryl thioglycolate	OCC(O)COC(=O)CS	1	0	0	0	0	0	0	0	0	0	0	0	0	0	0	0	0	0	0	0	0	0	0	0	0	0	0	0	0	0	0	0	0	0	0	0	0	0	0	0	0	0	0	0	0	0	0	0
Glyoxal	O=CC=O	1		0	0	0	0	0	0	0	0	1	0	0	0	0	0	0	0	0	0	0	0	0	0	1	0	0	0	0	0	0	0	0	0	0	0	0	0	0	0	0	0	0	0	0	0	0	0
4-Hydroxybenzoic acid	OC(=O)c1ccc(O)cc1	0	0	0	0	0	0	0	0	0	0	0	0	0	0	0	0	0	0	0	0	0	0	0	0	0	0	0	0	0	0	0	0	0	0	0	0	0	0	0	0	0	0	0	0	0	0	0	0
Hydroxycitronellal	CC(CCCC(C)(C)O)CC=O	1	1	0	0	0	0	0	0	0	0	1	0	0	0	0	0	0	0	0	0	0	0	0	0	1	0	0	0	0	1	0	0	0	0	0	0	0	0	0	0	0	0	0	0	0	0	0	0
Hydroxyethyl-ethylenediamine	NCCNCCO	1	1	0	0	0	0	0	0	0	0	0	0	0	0	0	0	0	0	0	0	0	0	0	0	0	1	0	0	0	0	0	0	0	0	0	0	0	0	0	0	0	0	0	0	0	0	0	0
Imidazolidinyl urea	OCN1C(NC(=O)NCNC(=O)NC2N(CO)C(=O)NC2=O)C(=O)NC1=O	1		0	0	0	0	0	0	0	0	0	0	1	0	0	1	1	0	0	0	0	0	0	0	0	0	0	0	0	0	0	0	0	0	0	0	0	0	0	0	0	0	0	0	1	0	0	0
Iododecane	CCCCCCCCCCCCI	1	1	0	0	0	0	0	0	0	0	0	0	0	0	0	0	0	0	0	0	0	0	0	0	0	0	0	1	0	0	0	0	0	0	0	0	0	0	0	0	0	0	0	0	0	0	0	0
Iodohexadecane	CCCCCCCCCCCCCCCCI	1	1	0	0	0	0	0	0	0	0	0	0	0	0	0	0	0	0	0	0	0	0	0	0	0	0	0	1	0	0	0	0	0	0	0	0	0	0	0	0	0	0	0	0	0	0	0	0
4-Isopropenyl-1-methyl-2-methylene-cyclohexane	CC1CCC(CC1=C)C(C)=C	0	0	0	0	0	0	0	0	0	0	0	0	0	0	0	0	0	0	0	0	0	0	0	0	0	0	0	0	0	0	0	0	0	0	0	0	0	0	0	0	0	0	0	0	0	0	0	0
Iodononane	CCCCCCCCCI	1		0	0	0	0	0	0	0	0	0	0	0	0	0	0	0	0	0	0	0	0	0	0	0	0	0	1	0	0	0	0	0	0	0	0	0	0	0	0	0	0	0	0	0	0	0	0
4-Isopropyl-1-methylene-cyclohexane	CC(C)C1CCC(=C)CC1	0	0	0	0	0	0	0	0	0	0	0	0	0	0	0	0	0	0	0	0	0	0	0	0	0	0	0	0	0	0	0	0	0	0	0	0	0	0	0	0	0	0	0	0	0	0	0	0
Iodopropynyl butylcarbamate	CCCCNC(=O)OC#CCI	1		0	0	0	0	0	0	0	0	0	0	0	0	0	0	0	0	0	0	0	0	0	0	0	0	0	1	0	0	0	0	0	0	0	0	0	0	0	0	0	0	0	0	0	0	0	0
Iodotetradecane	CCCCCCCCCCCCCCI	1	1	0	0	0	0	0	0	0	0	0	0	0	0	0	0	0	0	0	0	0	0	0	0	0	0	0	1	0	0	0	0	0	0	0	0	0	0	0	0	0	0	0	0	0	0	0	0
Isoeugenol	COc1cc(C=CC)ccc1O	1	1	0	0	0	0	1	0	1	0	0	0	0	0	0	0	0	1	1	0	0	0	0	0	0	0	0	0	0	0	1	1	0	1	0	0	0	0	0	0	0	0	0	0	0	0	0	0
Isononanoyl chloride	CC(C)CCCCCC(Cl)=O	1	1	0	0	0	0	0	0	0	0	0	0	0	0	0	0	0	0	0	0	0	0	0	0	0	0	0	0	0	0	0	0	0	0	0	0	0	0	0	0	0	0	0	0	0	0	0	0
5-Chloro-2,6-dimethoxy-4-methylquinoline	COc1cc(C)c2c(Cl)c(OC)ccc2n1	0	0	0	0	0	0	0	0	0	0	0	0	0	0	0	0	0	0	0	0	0	0	0	0	0	0	0	0	0	0	0	0	0	0	0	0	0	0	0	0	0	0	0	0	0	0	0	0
5-Methoxy-2-nitro-4-(trifluoromethyl) benzene acetonitrile	COc1cc(CC#N)c(cc1C(F)(F)F)N(=[O])=[O]	0	0	0	0	0	0	0	0	0	0	0	0	0	0	0	0	0	0	0	0	0	0	0	0	0	0	0	0	0	0	0	0	0	0	0	0	0	0	0	0	0	0	0	0	0	0	0	0
6-Iodo-quinazolin-4-ol	Ic1ccc2N=CNC(=O)c2c1	0		0	0	0	0	0	0	0	0	0	0	0	0	0	0	0	0	0	0	0	0	0	0	0	0	0	0	0	0	0	0	0	0	0	0	0	0	0	0	0	0	0	0	0	0	0	0
Isopropyl isoeugenol	CC=Cc1ccc(O)c(OC(C)C)c1	1		0	0	0	0	1	0	0	0	0	0	0	0	0	0	0	1	1	0	0	0	0	0	0	0	0	0	0	0	1	1	0	0	0	0	0	0	0	0	0	0	0	0	0	0	0	0
Isopropyl myristate	CCCCCCCCCCCCCC(=O)OC(C)C	1	1	0	0	0	0	0	0	0	0	0	0	0	0	0	0	0	0	0	0	0	0	0	0	0	0	0	0	0	0	0	0	0	0	0	0	0	0	0	0	0	0	0	0	0	0	0	0
6-Methoxy-4-methyl-2(1H)-quinolinone	COc1ccc2NC(=O)C=C(C)c2c1	0		0	0	0	0	0	0	0	0	0	0	0	0	0	0	0	0	0	0	0	0	0	0	0	0	0	0	0	0	0	0	0	0	0	0	0	0	0	0	0	0	0	0	0	0	0	0
6-Methylcoumarin	Cc1ccc2OC(=O)C=Cc2c1	0	0	0	0	0	0	0	0	0	0	0	0	0	0	0	0	0	0	0	0	0	0	0	0	0	0	0	0	0	0	0	0	0	0	0	0	0	0	0	0	0	0	0	0	0	0	0	0
Lauryl gallate	CCCCCCCCCCCCOC(=O)c1cc(O)c(O)c(O)c1	1	0	0	0	0	0	0	0	0	0	0	0	0	0	0	0	0	1	1	0	0	0	0	0	0	0	0	0	0	0	0	0	0	0	0	0	0	0	0	0	0	0	0	0	0	0	0	1
Lauryl sulfate	CCCCCCCCCCCCOS(O)(=O)=O	1	1	0	0	0	0	0	0	0	0	0	0	0	0	0	0	0	0	0	0	0	0	0	0	0	0	0	0	0	0	0	0	0	0	0	0	0	0	0	0	0	0	0	0	0	0	0	0
Limonene	CC(=C)C1CCC(C)=CC1	1		0	0	0	0	0	0	0	0	0	0	0	0	0	0	0	0	0	0	0	0	0	0	0	0	0	0	0	0	0	0	0	0	0	0	0	0	0	0	0	0	0	0	0	0	0	0
Linalool aldehyde	CC(C=O)=CCCC(C)(O)C=C	1	1	1	0	0	0	0	0	0	0	1	1	0	0	0	0	0	0	0	0	0	0	0	0	0	0	0	0	0	0	0	0	0	0	0	0	0	0	0	0	0	0	0	0	0	0	0	0
Linoleic acid	CCCCCC=CCC=CCCCCCCCC(O)=O	1	1	0	0	0	0	0	0	0	0	0	0	0	0	0	0	0	0	0	0	0	0	0	0	0	0	0	0	0	0	0	0	0	0	0	0	0	0	0	0	0	0	0	0	0	0	0	0
Linolenic acid	CCC=CCC=CCC=CCCCCCCCC(O)=O	1	1	0	0	0	0	0	0	0	0	0	0	0	0	0	0	0	0	0	0	0	0	0	0	0	0	0	0	0	0	0	0	0	0	0	0	0	0	0	0	0	0	0	0	0	0	0	0
8-Hydroxy-5-{1-hydroxy-2-[(2-{4-[(4-methoxy-3-phenylphenyl)amino]phenyl}ethyl)amino]ethyl}-1,2-dihydroquinolin-2-one	COc1ccc(Nc2ccc(CCNCC(O)c3ccc(O)c4NC(=O)C=Cc34)cc2)cc1-c1ccccc1	0	0	0	0	0	0	0	0	0	0	0	0	0	0	0	0	0	0	0	0	0	0	0	0	0	0	0	0	0	0	0	0	0	0	0	0	0	0	0	0	0	0	0	0	0	0	0	0
Methyl 2-nonynoate	CCCCCCC#CC(=O)OC	1	1	0	0	0	0	0	0	0	0	0	0	0	0	0	0	0	0	0	0	0	0	0	0	0	0	0	0	0	0	0	0	0	0	0	0	0	0	0	0	0	0	0	0	0	0	0	0
Methyl 4-(bromomethyl)benzoate	COC(=O)c1ccc(CBr)cc1	1		0	0	0	0	0	0	0	0	0	0	0	0	0	0	0	0	0	0	0	0	0	0	0	0	0	1	1	0	0	0	0	0	0	0	0	0	0	0	0	0	0	0	0	0	0	0
Adipic acid	OC(=O)CCCCC(O)=O	0	0	0	0	0	0	0	0	0	0	0	0	0	0	0	0	0	0	0	0	0	0	0	0	0	0	0	0	0	0	0	0	0	0	0	0	0	0	0	0	0	0	0	0	0	0	0	0
Methyl acrylate	COC(=O)C=C	1		0	0	0	0	1	0	0	0	0	1	0	0	0	0	0	0	0	0	0	0	0	0	0	0	1	0	0	0	0	0	0	0	0	0	0	0	0	0	0	0	0	0	0	0	0	0
Methyl dodecanesulfonate	CCCCCCCCCCCCS(=O)(=O)OC	1	1	0	0	0	0	0	0	0	0	0	0	0	0	0	0	0	0	0	0	0	0	0	0	0	0	0	0	0	0	0	0	0	0	0	0	0	0	0	0	0	0	0	0	0	0	0	0
Methyl hexadec-1-ene-1- sulfonate	CCCCCCCCCCCCCCC=CS(=O)(=O)OC	1	1	0	0	0	0	1	0	0	0	0	0	0	0	0	0	0	0	0	0	0	0	0	0	0	0	0	0	0	0	0	0	0	0	0	0	0	0	0	0	0	0	0	0	0	0	0	0
Methyl hexadecane sulfonate	CCCCCCCCCCCCCCCCS(=O)(=O)OC	1	1	0	0	0	0	0	0	0	0	0	0	0	0	0	0	0	0	0	0	0	0	0	0	0	0	0	0	0	0	0	0	0	0	0	0	0	0	0	0	0	0	0	0	0	0	0	0
Methyl methacrylate	COC(=O)C(C)=C	1	1	0	0	0	0	0	0	0	0	0	1	0	0	0	0	0	0	0	0	0	0	0	0	0	0	1	0	0	0	0	0	0	0	0	0	0	0	0	0	0	0	0	0	0	0	0	0
Methyl methanesulfonate	COS(C)(=O)=O	1		0	0	0	0	0	0	0	0	0	0	0	0	0	0	0	0	0	0	0	0	0	0	0	0	0	0	0	0	0	0	0	0	0	0	0	0	0	0	0	0	0	0	0	0	0	0
Methyl pyruvate	COC(=O)C(C)=O	1		0	0	0	0	0	0	0	0	0	1	0	1	0	0	0	0	0	0	0	0	0	0	0	0	1	0	0	0	0	0	0	0	0	0	0	0	0	0	0	0	0	0	0	0	0	0
b-Terpinene	CC(C)C1=CCC(=C)CC1	0		0	0	0	0	0	0	0	0	0	0	0	0	0	0	0	0	0	0	0	0	0	0	0	0	0	0	0	0	0	0	0	0	0	0	0	0	0	0	0	0	0	0	0	0	0	0
Methyl(2-sulfomethyl)octadecanoate	CCCCCCCCCCCCCCCCC(CS(O)(=O)=O)C(=O)OC	1		0	0	0	0	0	0	0	0	0	0	0	0	0	0	0	0	0	0	0	0	0	0	0	0	0	0	0	0	0	0	0	0	0	0	0	0	0	0	0	0	0	0	0	0	0	0
m-Phenylenebis-(methylamine)	CNc1cccc(NC)c1	1		0	0	0	0	0	0	0	0	0	0	0	0	0	1	1	0	0	0	0	0	0	0	0	0	0	0	0	0	0	0	0	0	0	0	0	0	0	0	0	0	0	0	0	0	0	0
Butanol	CCCCO	0		0	0	0	0	0	0	0	0	0	0	0	0	0	0	0	0	0	0	0	0	0	0	0	0	0	0	0	0	0	0	0	0	0	0	0	0	0	0	0	0	0	0	0	0	0	0
Chlorobenzene	Clc1ccccc1	0		0	0	0	0	0	0	0	0	0	0	0	0	0	0	0	0	0	0	0	0	0	0	0	0	0	0	0	0	0	0	0	0	0	0	0	0	0	0	0	0	0	0	0	0	0	0
N-(3,4-Dichlorophenyl)-n'- (1-methylethyl)- imidodicarbon-imidic diamide monohydrochloride	CC(C)N(C(N)=N)C(=N)Nc1ccc(Cl)c(Cl)c1	1		0	0	0	0	0	0	0	0	0	0	1	0	0	1	1	0	0	0	0	0	1	0	0	0	0	0	0	0	0	0	0	0	0	0	0	0	0	0	0	0	0	0	0	0	0	0
N-(4-Methoxyphenyl)-3-oxobutanamide	COc1ccc(NC(=O)CC(C)=O)cc1	1	0	0	1	0	0	0	0	0	0	0	0	1	0	0	1	1	0	0	0	0	0	0	0	0	0	0	0	0	0	0	0	0	0	0	0	0	0	1	0	0	0	0	0	1	0	0	0
Coumarin	O=C1Oc2ccccc2C=C1	0	0	0	0	0	0	0	0	0	0	0	0	0	0	0	0	0	0	0	0	0	0	0	0	0	0	0	0	0	0	0	0	0	0	0	0	0	0	0	0	0	0	0	0	0	0	0	0
Diethyl pthalate	CCOC(=O)c1ccccc1C(=O)OCC	0		0	0	0	0	0	0	0	0	0	0	0	0	0	0	0	0	0	0	0	0	0	0	0	0	0	0	0	0	0	0	0	0	0	0	0	0	0	0	0	0	0	0	0	0	0	0
N-[2-(Diethylamino)ethyl]-2-[[(4-fluorophenyl)-methyl]thio]-4,5,6,7-tetrahydro-4-oxo-n-[[4'-(trifluoromethyl)-[1,1'-biphenyl]-4-yl]methyl]-1h-cyclopentapyrim-idine-1-acetamide	CCN(CC)CCN(Cc1ccc(cc1)-c1ccc(cc1)C(F)(F)F)C(=O)CN1C2=C(CCC2)C(=O)N=C1SCc1ccc(F)cc1	1	0	0	0	0	0	0	1	0	0	0	0	0	0	0	0	0	0	0	0	0	1	0	0	0	0	0	0	0	0	0	0	0	0	0	0	0	0	0	0	0	0	0	0	0	0	0	0
Dimethyl carbonate	COC(=O)OC	0		0	0	0	0	0	0	0	0	0	0	0	0	0	0	0	0	0	0	0	0	0	0	0	0	0	0	0	0	0	0	0	0	0	0	0	0	0	0	0	0	0	0	0	0	0	0
Ethyl 1H-1,2,4-triazole-5-carboxylate	CCOC(=O)c1nnc[nH]1	0		0	0	0	0	0	0	0	0	0	0	0	0	0	0	0	0	0	0	0	0	0	0	0	0	0	0	0	0	0	0	0	0	0	0	0	0	0	0	0	0	0	0	0	0	0	0
N-Ethyl-N-nitrosourea	CCN(N=O)C(N)=O	1		0	0	0	0	0	0	0	0	0	0	0	0	0	0	0	0	0	0	0	0	0	0	0	0	0	0	0	0	0	0	0	0	0	0	0	0	0	0	0	0	0	0	0	0	0	0
N-Isopropyl-n-phenyl-2-(2-phenylamino-phenylamino)-acetamide	CC(C)N(C(=O)CNc1ccccc1Nc1ccccc1)c1ccccc1	1		0	0	0	0	0	0	0	0	0	0	1	0	0	1	1	0	1	0	0	0	0	0	0	0	0	0	0	0	0	0	0	0	0	0	0	0	0	0	0	0	0	0	0	0	0	0
N-Methyl-N-nitrosourea	CN(N=O)C(N)=O	1		0	0	0	0	0	0	0	0	0	0	0	0	0	0	0	0	0	0	0	0	0	0	0	0	0	0	0	0	0	0	0	0	0	0	0	0	0	0	0	0	0	0	0	0	0	0
Nonanoyl chloride	CCCCCCCCC(Cl)=O	1	1	0	0	0	0	0	0	0	0	0	0	0	0	0	0	0	0	0	0	0	0	0	0	0	0	0	0	0	0	0	0	0	0	0	0	0	0	0	0	0	0	0	0	0	0	0	0
Norbornene fluoroalcohol	FOC1=C2CCC(C2)C1	1	0	0	0	0	0	0	0	0	0	0	0	0	1	0	0	0	0	0	0	0	0	0	0	0	0	0	0	0	0	0	0	0	0	0	0	0	0	0	0	0	0	0	0	0	0	0	0
Glycerol	OCC(O)CO	0		0	0	0	0	0	0	0	0	0	0	0	0	0	0	0	0	0	0	0	0	0	0	0	0	0	0	0	0	0	0	0	0	0	0	0	0	0	0	0	0	0	0	0	0	0	0
Octanol	CCCCCCCCO	1	1	0	0	0	0	0	0	0	0	0	0	0	0	0	0	0	0	0	0	0	0	0	0	0	0	0	0	0	0	0	0	0	0	0	0	0	0	0	0	0	0	0	0	0	0	0	0
Oleic acid	CCCCCCCCC=CCCCCCCCC(O)=O	1	1	0	0	0	0	0	0	0	0	0	0	0	0	0	0	0	0	0	0	0	0	0	0	0	0	0	0	0	0	0	0	0	0	0	0	0	0	0	0	0	0	0	0	0	0	0	0
Oleyl methanesulfonate	CCCCCCCCC=CCCCCCCCCOS(C)(=O)=O	1	1	0	0	0	0	0	0	0	0	0	0	0	0	0	0	0	0	0	0	0	0	0	0	0	0	0	0	0	0	0	0	0	0	0	0	0	0	0	0	0	0	0	0	0	0	0	0
Oripavine	COC1=CC=C2C3Cc4ccc(O)c5OC1C2(CCN3C)c45	1		0	0	0	0	0	0	0	0	0	0	0	0	0	0	0	0	0	0	0	0	0	0	0	0	0	0	0	0	0	0	0	0	0	0	0	0	0	0	0	0	0	0	0	0	0	0
Oxalic acid	OC(=O)C(O)=O	1	0	0	0	0	0	0	0	0	0	0	0	0	0	0	0	0	0	0	0	0	0	0	0	0	0	0	0	0	0	0	0	0	0	0	0	0	0	0	0	0	0	0	0	0	0	0	0
Hexane	CCCCCC	0		0	0	0	0	0	0	0	0	0	0	0	0	0	0	0	0	0	0	0	0	0	0	0	0	0	0	0	0	0	0	0	0	0	0	0	0	0	0	0	0	0	0	0	0	0	0
Palmitoyl chloride	CCCCCCCCCCCCCCCC(Cl)=O	1	1	0	0	0	0	0	0	0	0	0	0	0	0	0	0	0	0	0	0	0	0	0	0	0	0	0	0	0	0	0	0	0	0	0	0	0	0	0	0	0	0	0	0	0	0	0	0
Penicillin G	CC1(C)SC2C(NC(=O)Cc3ccccc3)C(=O)N2C1C(O)=O	1	0	0	0	0	0	0	1	0	0	0	0	0	0	0	0	0	0	0	0	0	0	0	0	0	0	0	0	0	0	0	0	0	0	0	0	0	0	0	0	0	0	0	0	0	0	0	0
Pentachlorophenol	Oc1c(Cl)c(Cl)c(Cl)c(Cl)c1Cl	1		0	0	0	0	0	0	0	0	0	0	0	0	0	0	0	0	0	0	0	0	0	0	0	0	0	0	0	0	0	0	0	0	0	0	0	0	0	0	0	0	0	0	0	0	0	0
Isopropanol	CC(C)O	0		0	0	0	0	0	0	0	0	0	0	0	0	0	0	0	0	0	0	0	0	0	0	0	0	0	0	0	0	0	0	0	0	0	0	0	0	0	0	0	0	0	0	0	0	0	0
Perillaldehyde	CC(=C)C1CCC(C=O)=CC1	1		1	0	0	0	0	0	0	0	1	1	0	0	0	0	0	0	0	0	0	0	0	0	0	0	0	0	0	0	0	0	0	0	0	0	0	0	0	0	0	0	0	0	0	0	0	0
Phenyl benzoate	O=C(Oc1ccccc1)c1ccccc1	1	1	0	0	0	0	0	0	0	0	0	0	1	0	0	0	0	0	0	0	0	0	0	0	0	0	0	0	0	0	0	0	0	0	0	0	0	0	0	0	0	0	0	0	0	0	0	0
Phenylacetaldehyde	O=CCc1ccccc1	1	1	0	0	0	0	0	0	0	0	1	0	0	0	0	0	0	0	0	0	0	0	0	0	1	0	0	0	0	1	0	0	0	0	0	0	0	0	0	0	0	0	0	0	0	0	0	0
Isopropyl dicyandiamide	CC(C)N(C#N)C#N	0		0	0	0	0	0	0	0	0	0	0	0	0	0	0	0	0	0	0	0	0	0	0	0	0	0	0	0	0	0	0	0	0	0	0	0	0	0	0	0	0	0	0	0	0	0	0
p-Methylhydrocinnamic aldehyde	Cc1ccc(CCC=O)cc1	1	1	0	0	0	0	0	0	0	0	1	0	0	0	0	0	0	0	0	0	0	0	0	0	1	0	0	0	0	1	0	0	0	0	0	0	0	0	0	0	0	0	0	0	0	0	0	0
Lactic acid	CC(O)C(O)=O	0	0	0	0	0	0	0	0	0	0	0	0	0	0	0	0	0	0	0	0	0	0	0	0	0	0	0	0	0	0	0	0	0	0	0	0	0	0	0	0	0	0	0	0	0	0	0	0
Methyl 4-hydroxybenzoate	COC(=O)c1ccc(O)cc1	0	0	0	0	0	0	0	0	0	0	0	0	0	0	0	0	0	0	0	0	0	0	0	0	0	0	0	0	0	0	0	0	0	0	0	0	0	0	0	0	0	0	0	0	0	0	0	0
p-tert-Butyl-a-ethyl-hydrocinnamal	CC(Cc1ccc(cc1)C(C)(C)C)C=O	1	1	0	0	0	0	0	0	0	0	1	0	0	0	0	0	0	0	0	0	0	0	0	0	1	0	0	0	0	1	0	0	0	0	0	0	0	0	0	0	0	0	0	0	0	0	0	0
p-tert-Butylphenyl Glycidyl Ether	CC(C)(C)c1ccc(OCC2CO2)cc1	1	1	0	0	0	0	0	0	0	0	0	0	0	0	0	0	0	0	0	1	1	0	0	0	0	0	0	0	0	0	0	0	0	0	0	0	0	0	0	0	0	0	0	0	0	0	0	0
Pyridine	c1ccncc1	1		0	0	0	0	0	0	0	0	0	0	0	0	0	0	0	0	0	0	0	0	0	0	0	0	0	0	0	0	0	0	0	0	0	0	0	0	0	0	0	0	0	0	0	0	0	0
Methyl salicylate	COC(=O)c1ccccc1O	0	0	0	0	0	0	0	0	0	0	0	0	0	0	0	0	0	0	0	0	0	0	0	0	0	0	0	0	0	0	0	0	0	0	0	0	0	0	0	0	0	0	0	0	0	0	0	0
R-Carvone	CC(=C)C1CC=C(C)C(=O)C1	1		0	0	0	1	0	0	0	0	0	1	0	0	0	0	0	0	0	0	0	0	0	0	0	0	0	0	0	0	0	0	0	0	0	0	0	0	0	0	0	0	0	0	0	0	0	0
Resorcinol	Oc1cccc(O)c1	1	1	0	0	0	0	0	0	0	0	0	0	0	0	0	0	0	0	0	0	0	0	0	0	0	0	0	0	0	0	0	0	0	0	0	0	0	0	0	0	0	0	0	0	0	0	0	1
N-[(1-Butyl-4-piperidinyl)methyl]-3,4-dihydro-2H-[1,3]oxazino[3,2-a]indole-10-carboxamide	CCCCN1CCC(CNC(=O)c2c3OCCCn3c3ccccc23)CC1	0		0	0	0	0	0	0	0	0	0	0	0	0	0	0	0	0	0	0	0	0	0	0	0	0	0	0	0	0	0	0	0	0	0	0	0	0	0	0	0	0	0	0	0	0	0	0
Octanoic acid	CCCCCCCC(O)=O	0	1	0	0	0	0	0	0	0	0	0	0	0	0	0	0	0	0	0	0	0	0	0	0	0	0	0	0	0	0	0	0	0	0	0	0	0	0	0	0	0	0	0	0	0	0	0	0
Oxyfluorfen	CCOc1cc(Oc2ccc(cc2Cl)C(F)(F)F)ccc1N(=[O])=[O]	0	0	0	0	0	0	0	0	0	0	0	0	0	0	0	0	0	0	0	0	0	0	0	0	0	0	0	0	0	0	0	0	0	0	0	0	0	0	0	0	0	0	0	0	0	0	0	0
Sodium ethyl xanthate	CCOC(S)=S	1		0	0	0	0	0	0	0	0	0	0	0	0	0	0	0	0	0	0	0	0	0	0	0	0	0	0	0	0	0	0	0	0	0	0	0	0	0	0	0	0	0	0	0	0	0	0
Sodium lauroyl lactylate	CCCCCCCCCCCC(=O)OC(C)C(=O)OC(C)C(O)=O	1	0	0	0	0	0	0	1	0	0	0	0	0	0	0	0	0	0	0	0	0	0	0	0	0	0	0	0	0	0	0	0	0	0	0	0	0	0	0	0	0	0	0	0	0	0	0	0
Sodium-3,3,5-trimethyl-benzenesulfonate	CC(CC(=O)Oc1ccc(cc1)S(O)(=O)=O)CC(C)(C)C	1	1	0	0	0	0	0	0	0	0	0	0	1	0	0	0	0	0	0	0	0	0	0	0	0	0	0	0	0	0	0	0	0	0	0	0	0	0	0	0	0	0	0	0	0	0	0	0
Squalene	CC(C)=CCCC(C)=CCCC(C)=CCCC=C(C)CCC=C(C)CCC=C(C)C	1		0	0	0	0	0	0	0	0	0	0	0	0	0	0	0	0	0	0	0	0	0	0	0	0	0	0	0	0	0	0	0	0	0	0	0	0	0	0	0	0	0	0	0	0	0	0
Propylene glycol	CC(O)CO	0		0	0	0	0	0	0	0	0	0	0	0	0	0	0	0	0	0	0	0	0	0	0	0	0	0	0	0	0	0	0	0	0	0	0	0	0	0	0	0	0	0	0	0	0	0	0
Propylparaben	CCCOC(=O)c1ccc(O)cc1	0	0	0	0	0	0	0	0	0	0	0	0	0	0	0	0	0	0	0	0	0	0	0	0	0	0	0	0	0	0	0	0	0	0	0	0	0	0	0	0	0	0	0	0	0	0	0	0
Quinoxyfen	Fc1ccc(Oc2ccnc3cc(Cl)cc(Cl)c23)cc1	0	0	0	0	0	0	0	0	0	0	0	0	0	0	0	0	0	0	0	0	0	0	0	0	0	0	0	0	0	0	0	0	0	0	0	0	0	0	0	0	0	0	0	0	0	0	0	0
Salicylic acid	OC(=O)c1ccccc1O	0	0	0	0	0	0	0	0	0	0	0	0	0	0	0	0	0	0	0	0	0	0	0	0	0	0	0	0	0	0	0	0	0	0	0	0	0	0	0	0	0	0	0	0	0	0	0	0
Succinic Acid	OC(=O)CCC(O)=O	0	0	0	0	0	0	0	0	0	0	0	0	0	0	0	0	0	0	0	0	0	0	0	0	0	0	0	0	0	0	0	0	0	0	0	0	0	0	0	0	0	0	0	0	0	0	0	0
Tetramethyl thiuram disulfide	CN(C)C(=S)SSC(=S)N(C)C	1		0	0	0	0	0	0	0	0	0	0	0	0	0	0	0	0	0	0	0	0	0	0	0	0	0	0	0	0	0	0	0	0	0	0	0	0	0	0	0	0	0	0	0	0	0	0
Trifluralin	CCCN(CCC)c1c(cc(cc1N(=O)=O)C(F)(F)F)N(=O)=O	1		0	0	0	0	0	0	0	0	0	0	0	0	0	0	0	0	0	0	0	0	0	0	0	0	0	0	0	0	0	0	0	0	0	0	0	0	0	0	0	0	0	0	0	0	0	0
Trimethylhexamine diamine	CC(CCCCN)C(C)(C)N	1		0	0	0	0	0	0	0	0	0	0	0	0	0	0	0	0	0	0	0	0	0	0	0	1	0	0	0	0	0	0	0	0	0	0	0	0	0	0	0	0	0	0	0	0	0	0
Undec-10-enal	C=CCCCCCCCCC=O	1	1	0	0	0	0	0	0	0	0	1	0	0	0	0	0	0	0	0	0	0	0	0	0	1	0	0	0	0	1	0	0	0	0	0	0	0	0	0	0	0	0	0	0	0	0	0	0
Undecylenic acid	OC(=O)CCCCCCCCC=C	1	1	0	0	0	0	0	0	0	0	0	0	0	0	0	0	0	0	0	0	0	0	0	0	0	0	0	0	0	0	0	0	0	0	0	0	0	0	0	0	0	0	0	0	0	0	0	0
Tartaric acid	OC(C(O)C(O)=O)C(O)=O	0	0	0	0	0	0	0	0	0	0	0	0	0	0	0	0	0	0	0	0	0	0	0	0	0	0	0	0	0	0	0	0	0	0	0	0	0	0	0	0	0	0	0	0	0	0	0	0
Veratraldehyde	COc1ccc(C=O)cc1OC	1	0	0	0	0	0	0	0	0	0	1	0	0	0	0	0	0	1	1	0	0	0	0	0	1	0	0	0	0	1	0	0	1	0	0	0	0	0	0	0	0	0	0	0	0	0	0	0
Vinylidene dichloride	ClC(Cl)=C	0		0	0	0	0	0	0	0	0	0	0	0	0	0	0	0	0	0	0	0	0	0	0	0	0	0	0	0	0	0	0	0	0	0	0	0	0	0	0	0	0	0	0	0	0	0	0
Vinylpyridine	C=Cc1ccncc1	1		0	0	0	0	1	0	0	0	0	0	0	0	0	0	0	0	0	0	0	0	0	0	0	0	1	0	0	0	0	0	0	0	0	0	0	0	0	0	0	0	0	0	0	0	0	0
[truncated: 60 more columns]
