# Supplementary material for: Alarms about structural alerts
Source: Royal Society of Chemistry journal article supplement (doi:10.1039/c6gc01492e), 2016-01-01
Supplement: c6gc01492e2.pdf [file c6gc01492e2.pdf]

## Supplementary Information

**Table S1.** Comparison of prediction outcomes of QSAR and multiple alerts generated by the OECD QSAR Toolbox for marketed and withdrawn drugs.

| Drug Name     | State     | QSAR predictions <sup>1</sup> | Toxic hazard classification by Cramer (extension) <sup>2</sup> | Toxic hazard classification by Cramer (original) <sup>2</sup> | Carcinogenicity (genotox and nongenotox) alerts by ISS <sup>2</sup> | DNA alerts for AMES, MN and CA by OASIS v.1.3 <sup>2</sup> | <i>In vitro</i> mutagenicity (Ames test) alerts by ISS <sup>2</sup> | <i>In vivo</i> mutagenicity (micronucleus) alerts by ISS <sup>2</sup> | Protein binding alerts for chromosomal aberration by OASIS v1.1 <sup>2</sup> | Protein binding alerts for skin sensitization by OASIS v1.3 <sup>2</sup> |
|---------------|-----------|-------------------------------|----------------------------------------------------------------|---------------------------------------------------------------|---------------------------------------------------------------------|------------------------------------------------------------|---------------------------------------------------------------------|-----------------------------------------------------------------------|------------------------------------------------------------------------------|--------------------------------------------------------------------------|
| Amineptine    | withdrawn | unsafe                        | High<br>(Class III)                                            | High<br>(Class III)                                           | No alert found                                                      | No alert found                                             | No alert found                                                      | Alerts                                                                | No alert found                                                               | No alert found                                                           |
| Duract        | withdrawn | unsafe                        | High<br>(Class III)                                            | High<br>(Class III)                                           | No alert found                                                      | No alert found                                             | No alert found                                                      | Alerts                                                                | No alert found                                                               | No alert found                                                           |
| Vioxx         | withdrawn | unsafe                        | High<br>(Class III)                                            | High<br>(Class III)                                           | No alert found                                                      | No alert found                                             | No alert found                                                      | Alerts                                                                | No alert found                                                               | Alerts                                                                   |
| Astemizole    | withdrawn | unsafe                        | High<br>(Class III)                                            | High<br>(Class III)                                           | Alerts                                                              | No alert found                                             | No alert found                                                      | Alerts                                                                | No alert found                                                               | No alert found                                                           |
| Cerivastatin  | withdrawn | unsafe                        | High<br>(Class III)                                            | High<br>(Class III)                                           | No alert found                                                      | No alert found                                             | No alert found                                                      | Alerts                                                                | No alert found                                                               | No alert found                                                           |
| Chlormezanone | withdrawn | unsafe                        | High<br>(Class III)                                            | High<br>(Class III)                                           | Alerts                                                              | No alert found                                             | No alert found                                                      | Alerts                                                                | No alert found                                                               | No alert found                                                           |
| Fenfluramine  | withdrawn | unsafe                        | High<br>(Class III)                                            | High<br>(Class III)                                           | No alert found                                                      | No alert found                                             | No alert found                                                      | No alert found                                                        | No alert found                                                               | No alert found                                                           |
| Flosequinan   | withdrawn | unsafe                        | High<br>(Class III)                                            | High<br>(Class III)                                           | Alerts                                                              | No alert found                                             | Alerts                                                              | Alerts                                                                | Alerts                                                                       | Alerts                                                                   |
| Glafenine     | withdrawn | unsafe                        | High<br>(Class III)                                            | High<br>(Class III)                                           | Alerts                                                              | No alert found                                             | No alert found                                                      | Alerts                                                                | No alert found                                                               | No alert found                                                           |
| Grepafloxacin | withdrawn | unsafe                        | High<br>(Class III)                                            | High<br>(Class III)                                           | Alerts                                                              | No alert found                                             | No alert found                                                      | Alerts                                                                | Alerts                                                                       | No alert found                                                           |
| Mibefradil    | withdrawn | unsafe                        | High<br>(Class III)                                            | High<br>(Class III)                                           | Alerts                                                              | No alert found                                             | No alert found                                                      | Alerts                                                                | No alert found                                                               | No alert found                                                           |

|              |           |        |                             |                             |                |                |                |               |                |                |
|--------------|-----------|--------|-----------------------------|-----------------------------|----------------|----------------|----------------|---------------|----------------|----------------|
| Troglitazone | withdrawn | unsafe | <b>High<br/>(Class III)</b> | <b>High<br/>(Class III)</b> | No alert found | No alert found | No alert found | <b>Alerts</b> | No alert found | No alert found |
| Ximelagatran | withdrawn | unsafe | <b>High<br/>(Class III)</b> | <b>High<br/>(Class III)</b> | No alert found | <b>Alerts</b>  | No alert found | <b>Alerts</b> | No alert found | No alert found |
| Aspirin      | marketed  | safe   | Low<br>(Class I)            | Low<br>(Class I)            | No alert found | No alert found | No alert found | <b>Alerts</b> | No alert found | <b>Alerts</b>  |
| Ibuprofen    | marketed  | safe   | Low<br>(Class I)            | Low<br>(Class I)            | No alert found | No alert found | No alert found | <b>Alerts</b> | No alert found | No alert found |
| Valtrex      | marketed  | safe   | <b>High<br/>(Class III)</b> | <b>High<br/>(Class III)</b> | No alert found | No alert found | No alert found | <b>Alerts</b> | No alert found | <b>Alerts</b>  |
| Microzide    | marketed  | safe   | <b>High<br/>(Class III)</b> | <b>High (Class<br/>III)</b> | <b>Alerts</b>  | No alert found | No alert found | <b>Alerts</b> | No alert found | No alert found |
| Neurontin    | marketed  | safe   | <b>High<br/>(Class III)</b> | <b>High<br/>(Class III)</b> | No alert found | No alert found | No alert found | <b>Alerts</b> | No alert found | No alert found |
| Enoxaparin   | marketed  | safe   | <b>High<br/>(Class III)</b> | <b>High<br/>(Class III)</b> | No alert found | No alert found | No alert found | <b>Alerts</b> | No alert found | No alert found |
| Lyrica       | marketed  | safe   | Low<br>(Class I)            | Low<br>(Class I)            | No alert found | No alert found | No alert found | <b>Alerts</b> | No alert found | No alert found |

## Reference

- 1) Zakharov, A. V.; Lagunin, A. A.; Filimonov, D. A.; Poroikov, V. V. Quantitative Prediction of Antitarget Interaction Profiles for Chemical Compounds. Chem. Res. Toxicol. 2012, 25 (11), 2378–2385
- 2) QSAR Toolbox (v. 3.3.5), <http://toolbox.oasis-lmc.org/?section=download&version=latest> (accessed Feb 16, 2016)

**Table S2.** Statistical characteristics of binary consensus model (results of 5-fold external cross-validation) compared with QSAR Toolbox

| <b>Model</b>          | <b>CCR</b> | <b>Sensitivity</b> | <b>PPV</b> | <b>Specificity</b> | <b>NPV</b> | <b>Coverage</b> |
|-----------------------|------------|--------------------|------------|--------------------|------------|-----------------|
| <b>Global</b>         | 0.69       | 0.72               | 0.67       | 0.66               | 0.70       | 1.00            |
| <b>Global (AD)</b>    | 0.74       | 0.79               | 0.71       | 0.69               | 0.77       | 0.95            |
| <b>Acylation</b>      | 0.76       | 0.65               | 0.69       | 0.88               | 0.85       | 1.00            |
| <b>Acylation (AD)</b> | 0.93       | 0.92               | 0.85       | 0.95               | 0.97       | 0.86            |
| <b>No Alert</b>       | 0.67       | 0.66               | 0.63       | 0.68               | 0.70       | 1.00            |
| <b>No Alert (AD)</b>  | 0.77       | 0.77               | 0.72       | 0.76               | 0.80       | 0.90            |

**Table S3.** Comparison of protein binding alerts, global QSAR models, and consensus QSAR models.

| <b>Model</b>   | <b>CCR</b> | <b>Sensitivity</b> | <b>PPV</b> | <b>Specificity</b> | <b>NPV</b> | <b>Coverage</b> |
|----------------|------------|--------------------|------------|--------------------|------------|-----------------|
| QSAR Toolbox   | 0.63       | 0.69               | 0.46       | 0.57               | 0.78       | 1.00            |
| Global QSAR    | 0.74       | 0.79               | 0.71       | 0.69               | 0.77       | 0.95            |
| Consensus QSAR | 0.72       | 0.64               | 0.71       | 0.81               | 0.75       | 1.00            |
